1 **Two synthetic 18-way outcrossed populations of diploid budding**  
2 **yeast with utility for complex trait dissection**

3

4 Robert A. Linder<sup>1</sup>, Arundhati Majumder<sup>1</sup>, Mahul Chakraborty<sup>1</sup>, and Anthony Long<sup>1,\*</sup>

5

6

7 <sup>1</sup> Department of Ecology and Evolutionary Biology, School of Biological Sciences,  
8 University of California, Irvine, Irvine, CA 92697-2525

9 Short title: *18-way budding yeast synthetic populations*

10

11 \*Corresponding author:

12 Anthony Long

13 *Address:* Department of Ecology and Evolutionary Biology, University of California, Irvine,  
14 Irvine, CA 92697-2525, USA

15 *Phone #:* 949 – 824 – 2562

16 *Email:* tdlong@uci.edu

## 17 **Abstract**

18 Advanced generation multi-parent populations (MPPs) are a valuable tool for dissecting  
19 complex traits, having more power than GWAS to detect rare variants, and higher  
20 resolution than F<sub>2</sub> linkage mapping. To extend the advantages of MPPs in budding yeast,  
21 we describe the creation and characterization of two outbred MPPs derived from eighteen  
22 genetically diverse founding strains. We carried out *de novo* assemblies of the genomes  
23 of the eighteen founder strains, such that virtually all variation segregating between these  
24 strains is known and represent those assemblies as Santa Cruz Genome Browser tracks.  
25 We discover complex patterns of structural variation segregating amongst the founders,  
26 including a large deletion within the vacuolar ATPase *VMA1*, several different deletions  
27 within the osmosensor *MSB2*, a series of deletions and insertions at *PRM7* and the  
28 adjacent *BSC1*, as well as copy number variation at the dehydrogenase *ALD2*.  
29 Resequenced haploid recombinant clones from the two MPPs have a median  
30 unrecombined block size of 66kb, demonstrating the population are highly recombined.  
31 We pool sequenced the two MPPs to 3270X and 2226X coverage and demonstrate that  
32 we can accurately estimate local haplotype frequencies using pooled data. We further  
33 down-sampled the poolseq data to ~20-40X and show that local haplotype frequency  
34 estimates remain accurate, with median error rate 0.8% and 0.6% at 20X and 40X,  
35 respectively. Haplotypes frequencies are estimated much more accurately than SNP  
36 frequencies obtained directly from the same data. Deep sequencing of the two  
37 populations revealed that ten or more founders are present at a detectable frequency for  
38 over 98% of the genome, validating the utility of this resource for the exploration of the  
39 role of standing variation in the architecture of complex traits.

40

41

42

43

44

## 45 **Introduction**

46 A complete understanding of the genetic basis of complex traits is a goal shared by many  
47 disciplines. Although much progress has been made in dissecting the genetic architecture  
48 of complex traits such as adaptation, disease susceptibility, human height, and crop  
49 performance, a major fraction of standing variation for most traits has remained  
50 recalcitrant to dissection (Manolio *et al.* 2009). This is often referred to as the ‘missing’  
51 heritability problem. Rapid progress in addressing the missing heritability problem seems  
52 most likely in model systems that can be genetically and experimentally manipulated in a  
53 controlled setting. In contrast to humans, in model genetic systems variants of subtle  
54 effect can be validated via allele replacement experiments.

55

56 One of the mainstays of modern genetic mapping studies has been the use of pairwise  
57 crosses between genetically diverged founder strains. Large segregating populations can  
58 then be used to map phenotype to genotype. This approach, laid out in its modern form  
59 for complex traits was initially described by (Lander and Botstein 1989) and reviewed in  
60 (Flint and Mott 2001; Mackay 2001; Liti and Louis 2012) has proven to be especially  
61 fruitful in budding yeast, such that mapped QTL tend to explain > 70% of the narrow-  
62 sense heritability of most traits (Ehrenreich *et al.* 2010; Bloom *et al.* 2013, 2015, 2019;  
63 Märtens *et al.* 2016). However, QTL mapping has suffered both from a lack of resolution  
64 and a severe under-sampling of the functional variation potentially segregating in natural

65 populations. In this regard, association studies enjoy much finer mapping resolution and  
66 sample a larger proportion of the variation present in a natural population (WTCCC 2007;  
67 Visscher 2008). However, large-scale association studies are often under-powered to  
68 detect rare alleles (Spencer *et al.* 2009), regions that harbor multiple causal sites in weak  
69 LD with one another (Pritchard 2001; Thornton *et al.* 2013), rare or poorly tagged  
70 structural variants (Hehir-Kwa *et al.* 2016) or variants that are poorly tagged more  
71 generally. Furthermore, as GWAS studies grow to include tens of thousands of  
72 individuals they can suffer from false positives from population stratification (Berg *et al.*  
73 2019) or other experimental block artifacts associated with large scale projects  
74 (Sebastiani *et al.* 2011; Chen *et al.* 2017).

75

76 Advanced generation multiparent populations (MPPs) consisting of recombinants derived  
77 from several founder individuals have been proposed as a bridge between pairwise  
78 linkage mapping and association studies in outbred populations (“The Collaborative  
79 Cross, a community resource for the genetic analysis of complex traits” 2004; Macdonald  
80 and Long 2007). MPPs are created by crossing several (inbred or isogenic) founder  
81 strains to one another in order to maximize diversity, and then intercrossing the resulting  
82 population for several additional generations to increase the number of recombination  
83 events in the population. In many model systems Recombinant Inbred Lines (RILs) are  
84 derived from the MPP via inbreeding. The resulting homozygous RILs are fine-grained  
85 mosaics of the original founding strains that have been successfully used to dissect  
86 complex traits in *Arabidopsis thaliana* (Kover *et al.* 2009; Huang *et al.* 2011), *Drosophila*  
87 *melanogaster* (Macdonald and Long 2007; King *et al.* 2012a, 2012b), *Mus musculus*

88 (Aylor *et al.* 2011; Threadgill and Churchill 2012), *Saccharomyces cerevisiae* (Cubillos *et*  
89 *al.* 2013), *Zea mays* (McMullen *et al.* 2009), *Caenorhabditis elegans* (Noble *et al.* 2019),  
90 and several other systems (de Koning and McIntyre 2017). MPP RILs are a powerful  
91 resource for dissecting complex traits due to increased mapping resolution relative to F2  
92 populations and increased natural variation sampled by the founders. Furthermore, unlike  
93 association studies, both rare alleles of large effect segregating among the founders as  
94 well as allelic heterogeneity can be detected in MPP RILs (Long *et al.* 2014). Although  
95 the majority of studies to date have studied RILs derived from MPPs, it is possible to  
96 dispense with the creation and maintenance of RILs and sample the MPP directly (Mott  
97 *et al.* 2000; Macdonald and Long 2007), and indeed early MPP efforts did not employ  
98 RILs.

99  
100 Despite the clear advantages of MPPs, only a single MPP has been described in budding  
101 yeast (Cubillos *et al.* 2013), which is surprising as this species is ideally suited in many  
102 other ways for the dissection of complex traits. Large population sizes can be maintained  
103 in a controlled environment and a few rounds of meiosis results in recombination events  
104 spaced at near genic resolution. The potential of MPPs in budding yeast was  
105 demonstrated by Cubillos *et al.*, who crossed four genetically highly diverged strains and  
106 intercrossed the resulting population for twelve generations to generate a highly  
107 recombined population that has been shown to be capable of mapping complex traits to  
108 high resolution (Cubillos *et al.* 2013, 2017). In order to expand the potential of budding  
109 yeast to contribute to our understanding of complex traits we have developed two large,  
110 highly outbred populations of budding yeast derived from a cross of 18 genetically

111 diverged founders. Like previous work, populations were intercrossed for 12 generations  
112 to produce highly recombined mosaic populations that capture a large amount of the  
113 standing variation present in *S. cerevisiae*. Here we describe the derivation of the  
114 founders that allows the 18-way cross to be carried out, *de novo* PacBio assemblies of  
115 each founder such that all variation segregating in the population is known, and the  
116 characterization of ten haploid recombinant clones from each population to estimate the  
117 size distribution of haplotype blocks in the MPPs. We further carry out deep short read  
118 resequencing of the MPPs, estimate founder haplotype frequencies as a function of  
119 location in the genome, and show that at Illumina sequencing coverages as low as ~20X-  
120 40X haplotype frequencies can be accurately estimated. The MPPs and tools we derive  
121 have great utility for dissecting complex traits in yeast.

122

## 123 **Materials and Methods**

### 124 *Strains and media*

125 All yeast strains used in this study came from heterothallic, haploid derivatives of a subset  
126 of the SGRP yeast strain collection kindly provided by Gianni Liti (Cubillos *et al.* 2009). A  
127 list of strains used, relevant genotypes (before and after our modifications), and their  
128 geographical origins is shown in Table 1. Additionally, two mate-type testing yeast strains  
129 were used (kindly provided by Ian Ehrenreich) that are selectively killed by the presence  
130 of either *Mat a* or *Mat  $\alpha$*  haploids, but not by diploids. For propagating plasmids,  
131 *Escherichia coli* strain DH5 $\alpha$  was used according to the manufacturer's recommendations  
132 (Invitrogen). Bacterial transformants were selected on LB agar, supplemented with  
133 100ug/mL ampicillin ('LBamp') (Fisher). Nonselective media for growth and maintenance

134 of all yeast strains included rich media consisting of 1% yeast extract, 2% peptone, and  
135 2% dextrose ('YPD') (Fisher). For solid media, 2% agar was added. Additionally, media  
136 consisting of 1% yeast extract, 2% peptone, 2% glycerol and 2.5% ethanol ('YPEG') was  
137 used to prevent the growth of *petite* mutants. For selecting yeast transformants, when  
138 *Ura3MX* was the marker, synthetic complete drop-out uracil (Sc -Ura) plates were used  
139 (Sunrise Scientific). When *KanMX*, *HphMX*, or *NatMX* were the markers used,  
140 transformants were selected on YPD plates supplemented with 200ug/mL of G418,  
141 300ug/mL of Hygromycin B ('hyg'), or 100ug/mL nourseothricin sulfate ('cloNAT'),  
142 respectively. For counterselection of yeast that lost the *Ura3MX* marker, synthetic  
143 complete media supplemented with 1mg/mL 5-FOA was used ('5-FOA'). Two types of  
144 sporulation media were used in this study. Type 1 consisted of 1% potassium acetate,  
145 0.1% yeast extract, and 0.05% dextrose ('PYD') to which ampicillin was added to a final  
146 concentration of 50ug/mL, while type 2 consisted of 1% potassium acetate and a 1X  
147 dilution of a 10X amino acid stock (composed of 3.7g of CSM -lysine (Sunrise Scientific)  
148 supplemented w/10mL of 10mg/mL lysine in 1L total volume), pH adjusted to 7 ('PA7').  
149 Just before use, ampicillin was added to PA7 to a final concentration of 100ug/mL.

150

### 151 *Modification of 24 haploid budding yeast strains to create founders for the synthetic* 152 *population*

153 The strains used in this study were modified by generating clean deletions of the *HO* gene  
154 to recover the *HphMX* marker, followed by replacement of a pseudogene, *YCR043C*,  
155 which is closely linked to the mating type locus, with either a *NatMX* cassette in *Mat a*



156 haploids or a *HphMX* cassette in *Mat α* haploids. This manipulation was carried out to  
157 enable high-throughput selection of diploids.

158

159 The *HphMX* marker in *HO* was recovered via transformation with a URA3 cassette  
160 flanked with direct repeats and selection on URA- plates followed by selection on 5-FOA  
161 plates to recover URA3. The URA3 cassette was assembled from four fragments: a  
162 pBluescript II KS(+) backbone linearized with EcoRV and gel purified (for propagation in  
163 *Escherichia coli*), the *URA3* gene from *Candida albicans* with flanking 500bp direct  
164 repeats from *Aschbya gossypii* (pAG61, addgene #35129), and a 450bp region directly  
165 upstream of the *HO* gene, and a 390bp region directly downstream of the *HO* gene.  
166 Primers pAG61\_HO-F/R were used to amplify *URA3* and the flanking direct repeats, while  
167 primers HO-US F/R and HO-DS F/R were used to amplify the regions flanking the *HO*  
168 gene from strain DBVPG6765. Primers used in this study are listed in Table S1 and  
169 included overhangs to allow for HiFi assembly. The four fragments were assembled using  
170 the NEB HiFi Assembly Master Mix according to the manufacturer's recommendations  
171 (NEB), transformed into chemically competent DH5α (Invitrogen), and recovered on LB  
172 Amp plates. Recovered URA plasmid cassettes with *HO* flanking sequences were PCR  
173 amplified from the plasmid template using primers HO-US-F and HO-DS-R, transformed  
174 into all 24 haploid strains using a standard lithium acetate protocol, and plated onto Sc -  
175 Ura plates. Single colonies were re-streaked onto Sc -Ura (X2), final colonies were tested  
176 for the presence of the *KanMX4* marker and absence of *HphMX4* marker via *G418* and  
177 *hyg* plating respectively. O/N cultures of successfully knocked-out transformants were  
178 spread onto 5-FOA plates and grown for 2d at 30°C in order to select for cells that had

179 'popped out' the *Ura3* cassette. Single colonies were re-streaked onto 5-FOA plates (2X).  
180 DNA was extracted (adapted from CSH handbook, p. 116) from the resulting colonies  
181 and DNA amplicons spanning the *HO* locus were obtained and Sanger sequenced to  
182 confirm the clean deletion of the *HO* gene.

183

184 To delete *YGR043C* in the 24 newly generated haploid *hoΔ Ura3::KanMX4* strains, oligos  
185 were ordered from IDT that amplify the entire MX4 cassette, including the promoter and  
186 terminator regions, and were tailed with 100 bases of homology to the regions  
187 immediately upstream and downstream of the *YGR043C* CDS. Either pAG32 (addgene  
188 #35122) or pAG25 (addgene #35121) were used as a template to generate knock-out  
189 constructs that incorporate the *HphMX4* or *NatMX4* cassettes, respectively. PCR  
190 reactions were cleaned up to remove unamplified circular plasmid template by gel  
191 extraction followed by digestion with DpnI and a PCR cleanup reaction (Qiagen PCR  
192 Purification kit). *Mat a* yeast were then transformed with the *cloNAT* resistance cassette,  
193 while *Mat α* yeast were transformed with the *hyg* resistance cassette using the standard  
194 lithium acetate protocol and selecting on YPD supplemented with cloNAT and G418 or  
195 hyg and G418, respectively. This double selection with G418 was done to ensure that  
196 cassette swapping had not occurred. To ensure *YGR043C* had been correctly replaced  
197 in each strain, the region was amplified and Sanger sequenced. All 24 newly generated  
198 strains were checked again for *HO* deletion using the HO-big-flank-F/R primers. The  
199 strains were also checked to ensure they had maintained the correct barcodes originally  
200 inserted in Cubillos et al throughout all the manipulation steps by amplifying the barcodes  
201 using the barcode-check-F/R primer pair and Sanger sequencing the amplicons using the

202 M13(-47)F primer. As a final check, all 24 haploid strains were streaked onto YPD  
 203 supplemented with hyg and cloNAT to ensure that none of the strains could grow on both  
 204 antibiotics.

205

206 **Table 1.** An overview of the strains used in this study.

| ADL*   | NCYC | Isolate       | Origin                                     | Original genotype                           | Modified genotype**                                    |
|--------|------|---------------|--------------------------------------------|---------------------------------------------|--------------------------------------------------------|
| A1     | 3597 | DBVPG6765     | Europe                                     | <i>Mat a, ho::HygMX,ura3::KanMX-Barcode</i> | <i>Mat a, hoΔ, ura3::KanMX-Barcode, ygr043C::NatMX</i> |
| A2     | 3600 | DBVPG6044     | West Africa; wine                          | <i>Mat a, ho::HygMX,ura3::KanMX-Barcode</i> | <i>Mat a, hoΔ, ura3::KanMX-Barcode, ygr043C::NatMX</i> |
| A3     | 3607 | YPS128        | USA; soil beneath Quercus alba             | <i>Mat a, ho::HygMX,ura3::KanMX-Barcode</i> | <i>Mat a, hoΔ, ura3::KanMX-Barcode, ygr043C::NatMX</i> |
| A4     | 3605 | Y12           | Japan; sake                                | <i>Mat a, ho::HygMX,ura3::KanMX-Barcode</i> | <i>Mat a, hoΔ, ura3::KanMX-Barcode, ygr043C::NatMX</i> |
| A5     | 3586 | Yllc17_E5     | France; wine                               | <i>Mat a, ho::HygMX,ura3::KanMX-Barcode</i> | <i>Mat a, hoΔ, ura3::KanMX-Barcode, ygr043C::NatMX</i> |
| A6     | 3591 | BC187         | USA; wine                                  | <i>Mat a, ho::HygMX,ura3::KanMX-Barcode</i> | <i>Mat a, hoΔ, ura3::KanMX-Barcode, ygr043C::NatMX</i> |
| A7     | 3590 | SK1           | USA; soil                                  | <i>Mat a, ho::HygMX,ura3::KanMX-Barcode</i> | <i>Mat a, hoΔ, ura3::KanMX-Barcode, ygr043C::NatMX</i> |
| A8     | 3598 | L_1374        | Chile; wine                                | <i>Mat a, ho::HygMX,ura3::KanMX-Barcode</i> | <i>Mat a, hoΔ, ura3::KanMX-Barcode, ygr043C::NatMX</i> |
| A9     | 3602 | UWOPS03_461_4 | Malaysia; nectar, Bertram palm             | <i>Mat a, ho::HygMX,ura3::KanMX-Barcode</i> | <i>Mat a, hoΔ, ura3::KanMX-Barcode, ygr043C::NatMX</i> |
| A10*** | 3604 | UWOPS05_227_2 | Malaysia; stingless bee, near Bertram palm | <i>Mat a, ho::HygMX,ura3::KanMX-Barcode</i> | <i>Mat a, hoΔ, ura3::KanMX-Barcode, ygr043C::NatMX</i> |
| A11    | 3592 | YJM978        | Italy; vagina, clinical isolate            | <i>Mat a, ho::HygMX,ura3::KanMX-Barcode</i> | <i>Mat a, hoΔ, ura3::KanMX-Barcode, ygr043C::NatMX</i> |

|        |      |               |                                           |                                                        |                                                                                                    |
|--------|------|---------------|-------------------------------------------|--------------------------------------------------------|----------------------------------------------------------------------------------------------------|
| A12    | 3594 | YJM975        | Italy; vagina, clinical isolate           | <i>Mat a</i> ,<br><i>ho::HygMX,ura3::KanMX-Barcode</i> | <i>Mat a</i> , <b><i>hoΔ</i></b> ,<br><i>ura3::KanMX-Barcode</i> ,<br><b><i>ygr043C::NatMX</i></b> |
| B1     | 3622 | DBVPG6765     | Europe                                    | <i>Mat α</i> ,<br><i>ho::HygMX,ura3::KanMX-Barcode</i> | <i>Mat α</i> , <b><i>hoΔ</i></b> ,<br><i>ura3::KanMX-Barcode</i> ,<br><b><i>ygr043C::HygMX</i></b> |
| B2     | 3625 | DBVPG6044     | West Africa; wine                         | <i>Mat α</i> ,<br><i>ho::HygMX,ura3::KanMX-Barcode</i> | <i>Mat α</i> , <b><i>hoΔ</i></b> ,<br><i>ura3::KanMX-Barcode</i> ,<br><b><i>ygr043C::HygMX</i></b> |
| B3     | 3632 | YPS128        | USA; soil beneath <i>Quercus alba</i>     | <i>Mat α</i> ,<br><i>ho::HygMX,ura3::KanMX-Barcode</i> | <i>Mat α</i> , <b><i>hoΔ</i></b> ,<br><i>ura3::KanMX-Barcode</i> ,<br><b><i>ygr043C::HygMX</i></b> |
| B4     | 3630 | Y12           | Japan; sake                               | <i>Mat α</i> ,<br><i>ho::HygMX,ura3::KanMX-Barcode</i> | <i>Mat α</i> , <b><i>hoΔ</i></b> ,<br><i>ura3::KanMX-Barcode</i> ,<br><b><i>ygr043C::HygMX</i></b> |
| B5     | 3611 | 273614N       | UK; fecal sample, clinical isolate        | <i>Mat α</i> ,<br><i>ho::HygMX,ura3::KanMX-Barcode</i> | <i>Mat α</i> , <b><i>hoΔ</i></b> ,<br><i>ura3::KanMX-Barcode</i> ,<br><b><i>ygr043C::HygMX</i></b> |
| B6     | 3631 | YPS606        | USA; bark of <i>Quercus rubra</i>         | <i>Mat α</i> ,<br><i>ho::HygMX,ura3::KanMX-Barcode</i> | <i>Mat α</i> , <b><i>hoΔ</i></b> ,<br><i>ura3::KanMX-Barcode</i> ,<br><b><i>ygr043C::HygMX</i></b> |
| B7     | 3624 | L_1528        | Chile; wine                               | <i>Mat α</i> ,<br><i>ho::HygMX,ura3::KanMX-Barcode</i> | <i>Mat α</i> , <b><i>hoΔ</i></b> ,<br><i>ura3::KanMX-Barcode</i> ,<br><b><i>ygr043C::HygMX</i></b> |
| B8     | 3614 | UWOPS83_787_3 | Bahamas; fruit, <i>Opuntia megacantha</i> | <i>Mat α</i> ,<br><i>ho::HygMX,ura3::KanMX-Barcode</i> | <i>Mat α</i> , <b><i>hoΔ</i></b> ,<br><i>ura3::KanMX-Barcode</i> ,<br><b><i>ygr043C::HygMX</i></b> |
| B9     | 3609 | UWOPS87_2421  | USA; cladode, <i>Opuntia megacantha</i>   | <i>Mat α</i> ,<br><i>ho::HygMX,ura3::KanMX-Barcode</i> | <i>Mat α</i> , <b><i>hoΔ</i></b> ,<br><i>ura3::KanMX-Barcode</i> ,<br><b><i>ygr043C::HygMX</i></b> |
| B10*** | 3628 | UWOPS05_217_3 | Malaysia; nectar, Bertram palm            | <i>Mat α</i> ,<br><i>ho::HygMX,ura3::KanMX-Barcode</i> | <i>Mat α</i> , <b><i>hoΔ</i></b> ,<br><i>ura3::KanMX-Barcode</i> ,<br><b><i>ygr043C::HygMX</i></b> |
| B11    | 3618 | YJM981        | Italy; vagina, clinical isolate           | <i>Mat α</i> ,<br><i>ho::HygMX,ura3::KanMX-Barcode</i> | <i>Mat α</i> , <b><i>hoΔ</i></b> ,<br><i>ura3::KanMX-Barcode</i> ,<br><b><i>ygr043C::HygMX</i></b> |
| B12    | 3613 | Y55           | France; grape                             | <i>Mat α</i> ,<br><i>ho::HygMX,ura3::KanMX-Barcode</i> | <i>Mat α</i> , <b><i>hoΔ</i></b> ,<br><i>ura3::KanMX-Barcode</i> ,<br><b><i>ygr043C::HygMX</i></b> |

207 \* These are the abbreviated names used throughout this manuscript. Note that all A strains are

208 *Mat a*, and all B strains *Mat α*.

209 \*\* Bold text indicates changes made from the original strain genotypes.

210 \*\*\* These two strains were excluded from subsequent experiments as they mate poorly with the  
211 other strains.

212

213 *18-way crossing scheme, version 1*

214 A full diallele cross of eleven *Mat a* and eleven *Mat α* strains (excluding strains A10 and  
215 B10) was carried out (with four strains in common). A schematic of the mating scheme is  
216 shown in Figure 1A, while Table 1 lists the strains used in this study. Strains A1-A5 and  
217 A6-A12 (excluding A10) were struck in horizontal rows onto two YPD plates each (total  
218 of 4 YPD plates), then strains B1-B5 and B6-B12 (excluding B10) were each struck in  
219 vertical rows onto two of the YPD plates such that each 'B' strains intersected with each  
220 'A' strains. All 121 pairwise combinations of the 'A' and 'B' strains were thus represented  
221 across the four YPD mating plates. Mating occurred O/N at 30°C after which diploids were  
222 selected by replica plating onto YPD plates with hyg and cloNAT. A single colony from  
223 each of the 121 crosses was then incubated O/N in YPD with hyg and cloNAT at 30°C at  
224 180RPM. An equal volume of each culture and 30% glycerol was used to make frozen  
225 stock that was then archived at -80°C. An equal volume from each diploid culture was  
226 then combined to make the 18-way population, which was washed twice with PYD + amp  
227 then split into two 1L flasks with 200mL total PYD + amp each. Sporulation was carried  
228 out for 5d *en mass* at 30°C at 180RPM to complete the first round of out-crossing.

229

230 *Additional outcrossing in the 18-way cross, version 1*

231 Eleven additional cycles of mass sporulation followed by random mating were carried out  
232 for a total of twelve rounds of outcrossing for both replicates (Table S3). After sporulation,  
233 50mL of culture was spun down at 2000g for 2m and resuspended in 1mL of Y-PER.  
234 Samples were transferred to a 1.5mL centrifuge tube and vortexed. Cells were washed  
235 twice and resuspended in 500uL of ddH<sub>2</sub>O with 5uL of 5U/uL zymolyase. The tubes were

236 shaken vigorously in the Geno Grinder 2000 at 750 shakes/minute for 45m. 500uL of  
237 400um silica beads were then added to the samples, which were again put in the Geno  
238 Grinder for 5m at 1500 shakes/minute. The supernatant was transferred to a fresh 1.5mL  
239 centrifuge tube, washed once in YPD, resuspended in 500uL of YPD, and transferred into  
240 50mL of YPD in a 1L flask. Mating was carried out O/N at 30°C at 40RPM. The next day,  
241 mated cells were harvested, transferred to YPD with cloNAT, hyg, and amp, and  
242 incubated O/N at 30°C at 180RPM. The next day, 7mL from the O/N culture was used to  
243 make glycerol stock while 5mL was harvested, washed twice, and resuspended in 200mL  
244 of PYD + amp. Sporulation was carried out for 5d at 30°C at 180RPM (see Table S2). If  
245 the experiment had to be paused, 5mL of glycerol stock from the most recently completed  
246 cycle was used to begin the next cycle of sporulation.

247

#### 248 *18-way crossing scheme, version 2*

249 A full diallele cross of the same eleven *Mat a* and eleven *Mat α* founder strains used to  
250 create 18F12v1 was again carried out. To initiate this process, an equal volume from  
251 cultures containing each *Mat a* founder strain were mixed with each *Mat α* founder strain  
252 in all 121 possible pairwise combinations in 24-well deep-well plates (hereafter '24DWP')  
253 in a total volume of 1mL of YPD (no ampicillin added) (see Note S1). Mating was carried  
254 out in liquid culture for 4-5h at 30°C at 50RPM, after which mating was verified by  
255 checking for the presence of zygotes and/or shmooing under a microscope. At this point,  
256 1mL of YPD supplemented with 200ug/mL cloNAT and 600ug/mL hyg was added to each  
257 culture (the final concentrations of cloNAT and hyg were 100ug/mL and 300ug/mL,  
258 respectively) to select for successfully mated diploids and incubated O/N at 200RPM at

259 30°C. After O/N selection, 140uL from each culture was combined w/140uL of 30%  
260 glycerol to make frozen stock of each cross. The remaining cultures were harvested at  
261 3000 RPM for 5m and the pellets were washed then resuspended in 4mL of PA7 + amp.  
262 Sporulation was carried out for 6d at 30°C at 275 RPM in the 24DWP.

263

264 All 121 sporulating cultures were checked using a microscope to determine the amount  
265 of sporulation that occurred; cultures were graded on a scale of 0-5 with 0 being no  
266 sporulation and 5 being almost complete sporulation. Crosses that did not sporulate were  
267 excluded from subsequent steps (see Table S2). After checking for sporulation, cultures  
268 were harvested, washed, then resuspended in 500uL of spore isolation solution (hereafter  
269 'SIS': 25U zymolyase + 10mM DTT + 50mM EDTA + 100mM Tris-HCl, pH 7.2 up to  
270 500uL) and incubated for 1h at 30°C at 250 RPM to spheroplast cells. Cultures were then  
271 harvested and resuspended in 1% Tween 20 to selectively lyse unsporulated cells.  
272 Following this, cultures were again harvested and resuspended in 500uL of spore  
273 dispersal solution (hereafter 'SDS': 1mg lysozyme + 5U zymolyase + 1% Triton X-100 +  
274 2% dextrose + 100mM PBS, pH 7.2 up to 500uL). Cultures were transferred to Eppendorf  
275 tubes with 500uL of 400um beads and bead milled using a Geno Grinder 2000 at 1500  
276 strokes per minute for 5m to break up tetrads after which all cultures were placed at 4°C  
277 O/N. The next day, all tubes were vortexed at high speed for 30s, the supernatant was  
278 transferred to a 24DWP, 500uL of 100mM PBS, pH 7.2 was added back to the beads,  
279 followed by vortexing for 30s and transferring to the same wells of a 24DWP to maximize  
280 recovery of spores from the beads. Cultures were washed once in PBS, then  
281 resuspended in 500uL of 100mM PBS, pH 7.2 and 100uL was transferred to a 96-well



282 clear plate to measure the OD630 of each culture in duplicate using a BioTek Synergy  
283 HT plate reader. OD630 measurements were then used to normalize the density of  
284 spores from each cross that were pooled together (see Note S2). The spore pool was  
285 washed twice with 5mL of YPD, then resuspended in 12.5mL of YPD. This culture was  
286 split in half and transferred to two 250mL flasks, each with 6.25mL of YPD, to establish  
287 two replicate populations. Mating was carried out O/N at 30°C with gentle shaking at 40  
288 RPM. The next day, 12.5mL of YPDach (with a 2x mix of ampicillin, cloNAT, and hyg)  
289 was added to each culture to select for diploids. Cultures were incubated O/N at 200 RPM  
290 at 30°C. This established replicate F<sub>2</sub> populations of the 18-way cross, version 2  
291 (hereafter '18F2v2'). The following day, 7mL of the replicate populations were frozen  
292 down at -80°C with an equal volume of 30% glycerol. The remaining volume was spun  
293 down and used to initiate a second round of outcrossing.

294

#### 295 *Additional outcrossing in the 18-way cross, version 2*

296 Eleven additional cycles of mass sporulation followed by random mating were carried out  
297 for a total of twelve rounds of outcrossing for both replicates. As replicate 2 was treated  
298 differently during a couple of cycles, replicate 1 was the population chosen for subsequent  
299 analyses and, as such, will be the only replicate of version 2 described further. Each cycle  
300 consisted of 3-6d of sporulation after which diploids were randomly mated for 3-4h. This  
301 was followed by an O/N selection step in YPDach to enrich for mated diploids. After  
302 selection, an aliquot of each population was frozen down at -80°C with the remaining  
303 culture used to initiate the next cycle of outcrossing. Table S3 enumerates the days of  
304 sporulation for each cycle as well as additional details regarding the culturing conditions



305 for both versions of the 18-way population. After each round of sporulation, cultures were  
306 processed as detailed above with the following modifications: 5mL of SIS, 10mL of 1%  
307 Tween 20, and 5mL of SDS were used to kill vegetative cells. Tetrads were disrupted by  
308 bead milling at 1500 strokes/minute using the Geno Grinder 2000 for 25-45m. The  
309 contents of the tubes were mixed thoroughly with a pipette to ensure maximal recovery  
310 of cells from the bead slurry. The supernatant was then transferred to 50mL Falcon tubes,  
311 after which 500uL of YPDa was added back to the tubes, which were then vortexed at the  
312 highest setting briefly. The supernatant was transferred to the same 50mL Falcon tube.  
313 Cultures were harvested, washed, then resuspended in 5mL of YPDa. At this point, cells  
314 were carefully mixed by pipetting and then transferred to a 250mL Erlenmeyer flask with  
315 7.5mL of YPDa. Spores were mated for 3-4h at 30°C at 40RPM, after which the presence  
316 of shmoos and/or zygotes was checked under the microscope. 12.5mL of YPDach was  
317 added to the mated cells, which were incubated O/N at 200RPM at 30°C. The next day,  
318 cells were transferred to 50mL Falcon tubes, 7mL of culture was mixed with an equal  
319 volume of 30% glycerol to make frozen stock, while the rest of the culture was spun down  
320 at 3000RPM for 5m. Cultures were washed twice, resuspended in 25mL of PA7, then  
321 transferred to a 250mL flask with 50uL of 100mg/mL ampicillin and sporulated at 30°C at  
322 275RPM to initiate the next cycle of outcrossing. Following the twelfth cycle of sporulation  
323 followed by random mating, cells were transferred to 1L flasks with 187.5mL of YPDach  
324 and incubated O/N at 30°C at 200RPM. The following day, all 200mL of culture was mixed  
325 with an equal volume of 40% glycerol and frozen down at -80°C in a combination of 2mL  
326 cryotubes and 15mL Falcon tubes.

327

328 **Table 2.** Assembly statistics for the 18 sequenced founder strains.

| Strain | Assembly size (Mb) | Assembly N50 (kb) | Assembly QV | Assembly BUSCO (complete) | Total PacBio data (Mb) | PacBio read N50 (kb) | Total Illumina data (Mb) | Type of Illumina reads | x PacBio coverage | x Illumina coverage |
|--------|--------------------|-------------------|-------------|---------------------------|------------------------|----------------------|--------------------------|------------------------|-------------------|---------------------|
| A5     | 12.13              | 757               | 48.8        | 0.990                     | 737                    | 11.10                | 3,396                    | PE100                  | 61.4              | 283.0               |
| A6     | 11.98              | 913               | 46.6        | 0.986                     | 620                    | 11.68                | 4,079                    | PE150                  | 51.7              | 340.0               |
| A7     | 12.62              | 901               | 66.2        | 0.990                     | 3,979                  | 5.97                 | 2,775                    | PE100                  | 331.6             | 231.3               |
| A8     | 12.03              | 917               | 55.5        | 0.993                     | 622                    | 11.79                | 3,420                    | PE100                  | 51.9              | 285.0               |
| A9     | 12.53              | 571               | 53.0        | 0.993                     | 5,845                  | 5.10                 | 2,769                    | PE100                  | 487.1             | 230.7               |
| A11    | 12.10              | 702               | 49.3        | 0.986                     | 644                    | 12.03                | 2,758                    | PE100                  | 53.7              | 229.8               |
| A12    | 12.00              | 795               | 45.5        | 0.993                     | 613                    | 11.83                | 3,563                    | PE100                  | 51.1              | 296.9               |
| B5     | 12.32              | 738               | 46.5        | 0.990                     | 741                    | 10.97                | 3,861                    | PE100                  | 61.7              | 321.8               |
| B6     | 12.10              | 772               | 44.9        | 0.990                     | 401                    | 11.67                | 2,906                    | PE100                  | 33.4              | 242.2               |
| B7     | 11.91              | 765               | 39.5        | 0.986                     | 719                    | 11.79                | 4,266                    | PE100                  | 59.9              | 355.5               |
| B8     | 11.99              | 802               | 66.0        | 0.990                     | 741                    | 12.00                | 3,054                    | PE100                  | 61.8              | 254.5               |
| B9     | 12.40              | 856               | 54.6        | 0.993                     | 1,083                  | 12.05                | 3,419                    | PE100                  | 90.2              | 284.9               |
| B11    | 12.12              | 789               | 55.0        | 0.990                     | 765                    | 12.13                | 2,236                    | PE100                  | 63.8              | 186.3               |
| B12    | 12.04              | 790               | 48.7        | 0.986                     | 804                    | 10.79                | 3,930                    | PE100                  | 67.0              | 327.5               |
| AB1    | 12.35              | 901               | 47.9        | 0.993                     | 3,315                  | 5.84                 | 3,509                    | PE150                  | 276.3             | 292.4               |
| AB2    | 12.83              | 741               | 66.2        | 0.990                     | 5,230                  | 4.77                 | 4,230                    | PE150                  | 435.8             | 352.5               |
| AB3    | 12.44              | 809               | 55.8        | 0.990                     | 3,254                  | 6.21                 | 3,891                    | PE150                  | 271.2             | 324.2               |
| AB4    | 12.32              | 800               | 55.7        | 0.990                     | 4,649                  | 6.43                 | 4,490                    | PE150                  | 387.4             | 374.2               |

329 \*Cells highlighted in blue represent founder strains that were previously sequenced using  
 330 PacBio technology in (Yue *et al.* 2017)

331  
 332

333 *Whole genome sequencing of the haploid founder strains*

334 All 18 founder strains were sequenced using a combination of PacBio long read and  
 335 Illumina short read technology. PacBio sequencing data was available from a previous  
 336 study for 6 of the 18 strains (founder AB1-AB4, A7, and A9) (Yue *et al.* 2017), which was  
 337 downloaded and reassembled using our pipeline so that all assemblies are directly  
 338 comparable. The remaining strains were struck out onto YPD plates for 3d at 30°C, after  
 339 which a single colony was inoculated into 50mL of YPDamp and incubated at 30°C at  
 340 200RPM O/N. DNA was extracted using the Qiagen G-tip DNA extraction kit. Purified

341 genomic DNA was sheared using 24-gauge blunt needles. The resulting sheared gDNA  
342 samples were quality checked by a FIGE run at 134V O/N and concentrations were  
343 measured using Qubit. Samples were considered acceptable if the majority of gDNA was  
344 sheared to between 20kb and 100kb. In our hands carefully controlling the gDNA size  
345 distribution results in longer N50 PacBio reads which gives better *de novo* assemblies  
346 with less data. SMRTbell libraries were prepared and sequenced at the UCI Genomics  
347 High Throughput Facility using a PacBio RSII machine. The details of PacBio library  
348 creation for the purpose of *de novo* genome assembly are described in (Chakraborty *et*  
349 *al.* 2016). The average per-site coverage of the six previously sequenced strains was  
350 365x as compared to 59x for the twelve strains sequenced in our hands, while the average  
351 PacBio read N50 for the previously sequenced strains was 5.73 kb as compared to  
352 11.65kb for the strains sequenced by our lab.

353

354 Libraries for Illumina sequencing were made for all 18 founder strains. The same genomic  
355 DNA that had been used to prep the SMRTbell libraries was used to make Illumina  
356 libraries. Genomic DNA from the six remaining strains was prepared using the Qiagen G-  
357 tip kit as above. All genomic DNA was sheared to ~300-400bp using the Covaris S220  
358 Focused Acoustic Shearer with the following settings: peak incident power (w) of 140,  
359 Duty Factor of 10%, Cycles per Burst of 200, Treatment time of 65s, temperature of 4°C,  
360 and water 12. Illumina compatible libraries were prepared using the NEBNext Ultra II DNA  
361 Library Prep kit along with the NEBNext Multiplex Oligos for Illumina (Index Primer Set 1)  
362 as per the manufacturer's recommendations. Adaptor-ligated DNA was size-selected and  
363 PCR-enriched for five cycles, followed by clean-up of the PCR reaction using AMPure XP

364 Beads as per the NEBNext Ultra II DNA Library Prep protocol. Sequencing was carried  
365 out using the Illumina HiSeq4000 with PE100 or PE150 reads (see Note S3). The average  
366 per-site coverage of the 18 founder strains was 290x with the lowest coverage being 186x  
367 (founder B11) and the highest coverage at 374x (founder AB4).

368

### 369 *Genome assembly*

370 We assembled the PacBio reads using canu v1.7 (commit r8700; options:  
371 corMhapSensitivity=high, corOutCoverage=500, minReadLength=500,  
372 corMinCoverage=0, correctedErrorRate=0.105) (Koren *et al.* 2017). We generated hybrid  
373 assemblies using the PacBio and Illumina reads for the twelve strains for which we  
374 generated the PacBio reads. The PacBio reads from the six strains from (Yue *et al.* 2017)  
375 were too short to assemble with DBG2OLC, the hybrid assembler we use (Ye *et al.* 2016).  
376 The DBG2OLC hybrid assemblies were used to fill gaps in the corresponding canu  
377 assemblies using quickmerge, following the two steps merging approach (Chakraborty *et*  
378 *al.* 2016; Solares *et al.* 2018). The PacBio reads from Yue *et al.* were sequenced using  
379 an older chemistry of Pacific Biosciences (P4-C2) than our PacBio reads (P6-C4), so they  
380 required a different algorithm for optimal polishing than the assemblies created with the  
381 P6-C4 reads. Hence, we polished the P4-C2 based assemblies twice using Quiver and  
382 the P6-C4 based assemblies twice using Arrow (smrtanalysis v5.2.1). Finally, we polished  
383 all assemblies twice with the paired end Illumina reads using Pilon (Walker *et al.* 2014).

384

### 385 *BUSCO assessment*

386 We estimated the number of fungi BUSCOs (n=290) in each polished assembly using  
387 BUSCO v3.0.2 (Waterhouse *et al.* 2018) (Table 2). For the augustus gene prediction step  
388 in BUSCO we used 'saccharomyces\_cerevisiae\_S288C' as the species option.

389

#### 390 *QV estimate*

391 To estimate assembly error rate, paired end Illumina reads used in assembly polishing  
392 were mapped to the final assembly using bowtie2 (Langmead and Salzberg 2012). SNPs  
393 and small indels were identified using freebayes v0.9.21 (-C 10 -O -q 20 -z 0.10 -E 0 -  
394 X -u -p 1 -F 0.75) (Garrison and Marth 2012a). To estimate the error rate, total bases due  
395 to SNPs and small indels (e) and the total number of assembly bases (b) with read  
396 coverage  $\geq 3$  were counted and qv was calculated as  $-10 \times \log(e/b)$  (Koren *et al.* 2017)  
397 (Table 2).

398

#### 399 *Santa Cruz Browser Tracks*

400 Assembled genomes were aligned to one another and the *SacCer3* reference genome  
401 using *ProgressiveCactus* (<https://github.com/ComparativeGenomicsToolkit/cactus>)  
402 (Paten *et al.* 2011a, 2011b). Santa Cruz Browser Track Hubs were created using the  
403 *hal2assemblyhub* script that is part of the *ProgressiveCactus* software  
404 (<https://github.com/ComparativeGenomicsToolkit/Comparative-Annotation-Toolkit>). The  
405 resulting SNAKE tracks are viewable at <http://bit.ly/2ZrreUd>. SNPs were identified  
406 between the founder strains using a generic GATK pipeline, with SNPs functionally  
407 annotated using SNPeff (Cingolani *et al.* 2012). Scripts to align the genomes and call  
408 SNPs in the founders are available here: [https://github.com/tdlong/yeast\\_resource](https://github.com/tdlong/yeast_resource).

409

410 *Analysis of structural variants*

411 We aligned each founder genome assembly to the s288c reference genome  
412 (GCA\_000146055.2) using MUMmer v4.0 (Marçais *et al.* 2018) (nucmer --maxmatch --  
413 prefix founder.ref.fasta founder.fasta). To annotate the SVs, the delta alignment file for  
414 each strain was then processed with SVMU (commit e9c0ea1) (Chakraborty *et al.* 2019).

415

416 *Whole genome sequencing of the two base populations*

417 The two base populations were deeply sequenced using Illumina technology. In total,  
418 4mL of the 18F12v1 frozen stock was thawed at RT, pelleted at 3000 RPM for 5m, and  
419 resuspended in 20mL of YPDamp. This was followed by incubation at 30°C for 3.5h at  
420 275RPM. Genomic DNA was extracted using the Qiagen DNeasy kit. The genomic DNA  
421 was sheared using the Covaris S220 as above and Illumina compatible libraries were  
422 prepared using the NEBNext Ultra II DNA Library Prep kit as above. The NEBNext and  
423 libraries were pooled and sequenced on the HiSeq4000 using PE100 reads. The  
424 NEBNext libraries were sequenced at a mean per-site coverage of 3270x.

425

426 For 18F12v2, similarly to 18F12v1, 4mL of frozen stock was thawed at RT, pelleted at  
427 3000RPM for 5m, and resuspended in 20mL of YPDamp, followed by incubation at 30°C  
428 for 3.5h at 275RPM. Genomic DNA was extracted using the Qiagen G-tip kit. Nextera  
429 libraries were prepped for 18F12v2 by following the standard Nextera protocol with slight  
430 modifications. Tagmentation reactions were carried out in 2.5uL reactions for 10m at  
431 55°C. Reactions were stopped by adding SDS to a final concentration of 0.02% followed

432 by incubation at 55°C for 7m. Samples were immediately transferred to ice. Limited cycle  
433 PCR was carried out to add two unique barcodes to each library to enable dual index  
434 sequencing. This avoids the problem of barcode switching when *N* i7 and *M* i5 barcodes  
435 are used to create *MN* combinations. The KAPA HiFi Ready Mix (2X) was used in  
436 conjunction with the KAPA forward and reverse primers to amplify tagmented libraries in  
437 25uL total volume. Thermocycling parameters consisted of 3m at 72°C, 5m at 98°C,  
438 followed by 15 cycles of 10s at 98°C, 30s at 63°C, and 30s at 72°C, with a hold of 72°C  
439 for 5m at the end. PCR reactions were cleaned up using AMPure XP Beads (Beckman  
440 Coulter, Inc.) and libraries quantified by Qubit. Sequencing was performed on the  
441 HiSeq4000 using PE150 reads. 18F12v2 libraries received 2226x coverage.

442

443 *Whole genome sequencing of the first two meiotic generations of the second base*  
444 *population*

445 For 18F1v2 and 18F2v2, ~1mL of frozen stock was thawed at RT, spun down at 7500  
446 RPM for 5m in microcentrifuge tubes, resuspended in 1mL of YPDamp, transferred to a  
447 250mL flask with 19mL of YPDamp and incubated at 30°C for 3.5h at 275RPM. Genomic  
448 DNA from both samples was extracted using the Qiagen G-tip kit. Nextera libraries were  
449 prepped by following the Nextera flex protocol using 1/5<sup>th</sup> reactions with slight  
450 modifications. Limited cycle PCR was carried out using the KAPA HiFi Ready Mix (2X) as  
451 detailed above to add barcoded Illumina-compatible adapters in 12.5uL reactions.  
452 Thermocycling parameters consisted of 3m at 72°C, 3m at 98°C, followed by 12 cycles  
453 of 45s at 98°C, 30s at 62°C, and 2m at 72°C, with a hold of 72°C for 1m at the end.  
454 Proteinase K was added to each reaction (50ug/mL final concentration) to digest the

455 polymerase. Samples were incubated for 30m at 37°C and 10m at 68°C. Reactions were  
456 cleaned up using the SPB beads provided with the Nextera flex kit. Sequencing was  
457 performed as above using PE100 reads. 18F1v2 received 98x coverage while 18F2v2  
458 received 73x coverage.

459

#### 460 *Whole genome resequencing of recombinant haploid clones*

461 Ten haploid recombinant clones (5 of each mating type) were isolated from each of the  
462 two base populations. 18F12v1-derived haploids were generated by sporulating an O/N  
463 culture of the 18F12v1 population in 2mL of PA7 in a 10mL culture tube at 30°C for 3d.  
464 Spore isolation and dispersal were carried out as detailed above for the creation of  
465 18F12v2 with 15m of bead milling to disperse spores. Spores were plated at low density  
466 onto YPD plates and incubated for 2d at 30°C. One of the YPD plates was then replica  
467 plated onto four different plates: YPD with hyg, YPD with cloNAT, YPD with mate-type  
468 tester 1, and YPD with mate-type tester 2. Five haploids of each mating type were  
469 inoculated into YPD O/N. Genomic DNA was extracted using the Qiagen DNeasy kit and  
470 Nextera libraries prepared as above. Libraries were sequenced on a HiSeq4000 using  
471 PE100 reads to a mean per-site coverage of ~32x.

472

473 18F12v2-derived haploids were generated by sporulating an O/N culture of the 18F12v2  
474 population in 4mL of PA7 in a 24 deep-well plate at 30°C at 275RPM for 3d. Spore  
475 isolation and dispersal were carried out as detailed above for the creation of 18F12v2  
476 with 20m of bead milling to disperse spores. Spores were plated at low density onto YPD  
477 plates and incubated at 30°C for 3d. 96 single colonies were then transferred into a 96



478 deep-well plate with YPDamp using sterile toothpicks. After O/N incubation at 30°C,  
479 200uL of culture from each well was transferred to a 96 shallow plate and pinned YPD  
480 plates with either cloNAT, hyg, mate-type tester 1, or mate-type tester 2 using a 48-well  
481 replicator tool. The source plate was covered with an adhesive membrane and stored at  
482 4°C. The mate typing plates were incubated at 30°C for 2d, after which five haploids of  
483 each mating type were transferred from the original source plate to 1.5mL eppendorfs  
484 and genomic DNA was extracted using the Qiagen DNeasy kit. Nextera libraries were  
485 prepared as above. Libraries were sequenced on a HiSeq4000 using PE150 reads to a  
486 mean per-site coverage of ~60x.

487

488

#### 489 *Haplotype calling in Illumina resequenced MPPs and recombinant haploid clones*

490 De-multiplexed fastq files were used in analyses. Detailed scripts/software versions to  
491 reproduce our analysis are located at [https://github.com/tdlong/yeast\\_resource.git](https://github.com/tdlong/yeast_resource.git).  
492 Briefly, reads were aligned to the *sacCer* reference genome using *bwa-mem* and default  
493 parameters (Li and Durbin 2009; Li 2013). We maintain two SNP lists, a set of known  
494 SNPs in the strains obtained from a GATK pipeline that only considers the isogenic  
495 founders, and a subset of those SNPs that are well-behaved (i.e., frequency of the REF  
496 allele close to zero or one in all founder lines, pass GATK qualify filters, etc.). The list of  
497 well-behaved SNPs that are polymorphic in the founders can be used to speed-up  
498 subsequent steps, where we sometimes examine hundreds of samples, since only  
499 variants polymorphic among the founders need be considered when working with  
500 samples from a synthetic population (except when calling newly arising mutations).

501 *samtools mpileup* (Li *et al.* 2009; Li 2011) and *bcftools* (Narasimhan *et al.* 2016) are used  
502 to query well-behaved known SNPs. We have no interest in calling genotypes, but  
503 instead simply output the frequency of the REF allele in each sample at each location  
504 (output=SNPtable). In a separate analysis *freebayes* (Garrison and Marth 2012b),  
505 *vcfallelicprimitives* (<https://github.com/vcflib/vcflib>), and *vt normalize* (Tan *et al.* 2015) are  
506 used to call all SNPs, and the SNPs not in our list of known SNPs considered candidate  
507 new mutations.

508

509 We have developed custom software to infer the frequency of each founder haplotype at  
510 each location in the genome in pooled samples using the SNPtable as input and the  
511 *haplotyper.limSolve.code.R* script in the github archive. This same algorithm can also be  
512 used without modification to infer genotypes in recombinant haploid clones. Briefly, we  
513 slide through the genome in 1kb steps considering a 60kb window for each step. For all  
514 SNPs in the window we calculate a Gaussian weight such that the 50 SNPs closest to the  
515 window center account for 50% of the sum of the weights. We then consider F founders  
516 and use the *lse* function of the *limSolve* package (*limSolve: Solving Linear Inverse*  
517 *Models*, R package 1.5.1) (Meersche *et al.* 2009) in R to identify a set of F mixing  
518 proportions (each greater than zero and summing to one) that minimize the sum of the  
519 weighted squared differences between founder haplotypes and the observed frequency  
520 of each SNP in a pooled sample. That is, for a N SNP window we call *lse* with the  
521 following parameters: A=N\*F matrix of founder genotypes, B=N\*1 vector of SNP  
522 frequencies in a pooled sample, E=F\*1 vector of 1's, F=1, G=F\*F identity matrix, H= F\*1  
523 vector of 0's, and Wa=N\*1 vector of weights. Finally, for windows where the  $i^{\text{th}}$  and  $j^{\text{th}}$

524 founders have near indistinguishable haplotypes, implying the sum of the two mixing  
525 proportions are correct, but not individual estimates, we estimate the haplotype frequency  
526 as half the sum of the two mixing proportions. This method of accounting for  
527 indistinguishable haplotypes is regional and is generalized to more than two near identical  
528 founders and multiple such sets.

529

### 530 *Validation of the haplotype caller*

531 In order to validate our haplotype-calling algorithm, we identified 70,478 SNPs private  
532 to a single founder strain (excluding those present in founders merged due to high  
533 sequence similarity). The haplotype caller was run on 18F12v2 using the full coverage  
534 data (i.e., 2230X) or down-sampled 18F12v2 to simulate a more typical poolseq re-  
535 sequencing depth (typical applications using the MPPs are likely to sequence hundreds  
536 of experimental units to ~20-60X). For each private SNP, the frequency of the SNP in the  
537 full coverage data was estimated and the founder harbouring that SNP identified. Since  
538 the sequence depth of the non-downsampled population is 2230X, the frequency of each  
539 private SNP is measured very accurately. We then infer the frequency of the founder  
540 haplotype harbouring the private SNP at the position closest to the private SNP, in both  
541 the full coverage and each downsampled population. The error rate associated with the  
542 haplotype caller is the absolute difference between frequency of each private SNP and  
543 the founder haplotype harbouring it.

544

545 In our examination of the relationship between haplotype and SNP frequency estimates  
546 (Figure 4) we identified and removed 91 outlier SNPs among the 71,301 private SNPs.

547 These SNPs were identified as private SNPs whose frequency was more than 5%  
548 different than the frequency of the haplotype harbouring it in the full dataset, while  
549 exhibiting flanking private SNPs in the same founder whose frequency agree with the  
550 founder frequency. We believe these outlier SNPs are cases where that particular SNP  
551 in a pooled sample cannot be aligned to the reference genome very accurately. It is  
552 noteworthy that it is more difficult to identify poorly performing SNPs that are not private  
553 to a single founder, and such SNPs likely hurt haplotype inference methods.

554

#### 555 *Delineating haplotype blocks in recombinant haploid clones*

556 The haplotype caller is primarily used to estimate the frequency of founder haplotypes at  
557 different positions in the genome in a DNA pool from a segregating population, but it can  
558 also be run on DNA obtained from a haploid or diploid clone. In a haploid clone the  
559 haplotype caller should return a haplotype frequency of close to 100% for one of the  
560 founder haplotypes for much of the genome, with sharp transitions between founder  
561 states near recombination breakpoints. In depicting the haplotypic structure of haploid  
562 clones we classify genomic regions at which the inferred haplotype frequency of a single  
563 founder (or multiple indistinguishable founders) is less than 95% as having an 'unknown'  
564 haplotype (these unknown intervals typically being associated with state transitions). We  
565 also observe intervals in which several founders are indistinguishable from one another  
566 (due to insufficient SNP divergence between the founders in these window). We could  
567 sometimes resolve these intervals to a single founding haplotype when flanking  
568 haplotypes were unambiguously called as derived from the same single founder. Custom  
569 R scripts were used for these analyses as well as to calculate the length of haplotype

570 blocks in haploid clones. Haplotype block sizes were inferred by finding the positional  
571 difference between the beginning and end of runs of the same haplotype.

572

### 573 *Data and reagent availability*

574 Strains and plasmids are available upon request. All genome sequencing data and  
575 assemblies have been deposited into public repositories. Sequence data generated for  
576 the two base populations (18F12v1, 18F12v2, 18F1v2, and 18F2v2) as well as the  
577 recombinant haploid clones are available in the Short Reads Archive under the bioproject  
578 PRJNA551443 in accessions SRX6465384 to SRX6465405 and SRX6983898 to  
579 SRX6983899. All PacBio and Illumina data generated for the 18 founding strains is also  
580 available in the Short Reads Archive under the bioproject PRJNA552112 in accessions  
581 SRX6380915 to SRX6380944. Detailed scripts/software versions to reproduce our  
582 analysis are located at [https://github.com/tldlong/yeast\\_resource.git](https://github.com/tldlong/yeast_resource.git).

583

## 584 **Results and Discussion**

585 *Recovery of  $hyg^r$  and insertion of dominant selectable markers for high-throughput diploid*  
586 *selection*

587 We further engineering a subset of the yeast SGRP resource strains (Cubillos *et al.* 2009)  
588 to serve as founders for an 18-way synthetic population. We first recovered the *hyg<sup>r</sup>*  
589 marker used to delete the *HO* gene in the haploid SGRP strains. Previous work  
590 (McDonald *et al.* 2016) replaced *YGR043C*, a pseudogene that is physically close to the  
591 mating type locus, with dominant selectable markers in order to facilitate high-throughput  
592 selection of diploids after mating. We echoed that approach here by replacing *YGR043C*

593 with *NatMX4* in 15 *Mat a* (or “A”) founders and with *HphMX4* in 15 *Mat α* (or “B” founders).  
594 The presence of these cassettes confers resistance to the antibiotics nourseothricin and  
595 hygromycin B, respectively, enabling the selection of doubly resistant diploids. All newly  
596 engineered strains are given in Table 1.

597

#### 598 *de novo assembly of high-quality reference genomes for the 18 founding strains*

599 We generated *de novo* genome assemblies for the founders used to create our MPPs  
600 using a hybrid sequencing strategy detailed in (Chakraborty *et al.* 2016) that involves  
601 using a combination of long-read (PacBio) and short-read (Illumina paired-end)  
602 sequencing technology. The *de novo* assemblies allow us to reliably identify structural  
603 variants while the overall assembly has a low per base pair error rate. We assembled  
604 58.9X PacBio reads on average (33-90X) for 12 of the founder strains, and re-assembled  
605 the other six strains using publicly available shorter length 364.9X PacBio reads on  
606 average. Despite the different number and chemistry of PacBio reads used in assembling  
607 the genomes, all of our assemblies are highly accurate (average  $qv = 52.5$ ) and show  
608 comparable contiguity. For example, the average contig N50 of our assemblies is ~800Kb  
609 (N50 = 50% of the assembly is contained within sequences of this length or longer),  
610 indicating that the majority of the chromosomes are represented as single contigs (Table  
611 2). Examination of 290 conserved fungal single copy orthologs (Benchmarking Single  
612 Copy Orthologs or BUSCO) show that completeness (~99%) of all our assembled  
613 genomes is comparable to the reference S288C assembly (99%).

614

615 We aligned the assemblies to one another and represent them as Santa Cruz genome  
616 browser tracks (<http://bit.ly/2ZrreUd>). These tracks have utility when looking for candidate  
617 causative variants in small regions of genetic interest. The large amount of genetic  
618 diversity sampled by the founders can be illustrated by zooming in on regions such as  
619 that shown in Figure 2, which highlights the numerous alleles segregating at a gene  
620 implicated in many genetic mapping studies in budding yeast, the highly pleiotropic *MKT1*.  
621 *MKT1* influences several cellular processes including the DNA damage response,  
622 mitochondrial genome stability, drug resistance, and post-transcriptional regulation of *HO*  
623 (Dimitrov *et al.* 2009; Ehrenreich *et al.* 2010; Tkach *et al.* 2012; Kowalec *et al.* 2015a).  
624 Studies have found that different alleles of *MKT1* can differentially affect several  
625 phenotypes, including mitochondrial genome stability and drug resistance. Variation at  
626 this gene amongst our founders includes ten nonsynonymous SNPs and thirty-four  
627 synonymous SNPs. Of the ten nonsynonymous SNPs, six are predicted to change the  
628 secondary structure of the protein. Taking into account only nonsynonymous SNPs, there  
629 are seven different alleles segregating amongst the founders (all segregating in our  
630 18F12v2 MPP).

631

632 The genome browser tracks are also useful for visualizing structural variants such as  
633 those shown in Figure 3, which highlights a large (>1kb) deletion in the vacuolar ATPase  
634 *VMA1* (Figure 3A) present in half of the founders. Previous work has shown that the  
635 deleted region encodes a self-splicing intein, PI-SceI, a site-specific homing  
636 endonuclease that catalyzes its' own integration into inteinless alleles of *VMA1* during  
637 meiosis (Gimble and Thorner 1992). This selfish genetic element has been shown to

638 persist in populations solely through horizontal gene transfer and is present in many  
639 species of yeast. Perturbation of *VMA1* itself has been shown to influence both replicative  
640 and chronological lifespan, resistance to metals, as well as oxidative stress tolerance  
641 (Kane 2007; Ruckenstein *et al.* 2014).

642

643 In addition to large deletions, copy number variants (CNVs) can also be found, such as  
644 that shown in Figure 3B, in which the cytoplasmic aldehyde dehydrogenase, *ALD2*, is  
645 duplicated in founder A5. Conversely, this gene has been deleted in founders B5 and B8.  
646 *ALD2* has been shown to be involved in the osmotic stress response as well as the  
647 response to glucose exhaustion (Navarro-Aviño *et al.* 1999). A more structurally complex  
648 region was identified on Chromosome VII (Figure 3C) at which multiple different deletions  
649 (ranging from ~50bp to >300bp) were found to occur at *MSB2*, an osmosensor involved  
650 in the establishment of cell polarity (O'Rourke and Herskowitz 2002; Cullen *et al.* 2004).  
651 Null alleles of *MSB2* have been shown to have decreased chemical resistance.

652

653 One of the most structurally complex regions we identify contains ~2kb of repetitive  
654 sequence and is present on chromosome IV (Figure 3D and E as well FigureS1) at which  
655 multiple different deletions (ranging from ~80bp to >500bp) as well as duplications occur  
656 in multiple founders within the *PRM7* and *BSC1* genes. Due to the highly complex nature  
657 of the variation present, this region is represented as a series of dot plots, with two  
658 founders highlighted in the main text (Figure 3D and E). Dot plots of this region in all  
659 founder strains are shown in FigureS1. A previous study demonstrated that although two  
660 distinct genes (*PRM7* and *BSC1*) are present in S288C, a combination of small deletions



661 and point mutations in another yeast strain (W303) have caused the STOP codon to be  
662 absent from *BSC1*, leading to the read-through transcription of a new gene that  
663 encompasses sequence from both *PRM7* and *BSC1* as well as the intergenic region  
664 between them (Kowalec *et al.* 2015b). This gene, *IMI1*, was shown to affect mtDNA  
665 stability as well as intracellular levels of reduced glutathione (GSH).

666

667 The above regions highlight the utility of our *de novo* genome assembly approach, as  
668 deletions and CNVs of this scale would be difficult to detect via the usual method of  
669 aligning short reads to a reference genome. But if an investigator mapped a QTL to one  
670 of these genes they would certainly want to know about the existence of the segregating  
671 structural variation.

672

673 Despite the large amount of natural variation present amongst the founders in general,  
674 some of the founders were found to be genetically very similar to one another (AB3/B6)  
675 Figure S2 and shown in Table S4), having less than 200 pairwise SNP differences. This  
676 lack of divergence makes this set of founders difficult to distinguish from one another for  
677 much of the genome and as a result we collapse them for subsequent analyses (despite  
678 that fact that a subset of these 200 differences could be functional). Three additional  
679 founders (A11/A12/B11) were also found to be highly genetically similar to one another,  
680 with, on average, less than 2,000 pairwise SNP differences. These differences are  
681 concentrated in a small number of regions, making these three founders distinguishable  
682 for these regions (but indistinguishable for much of the remainder of the genome). We  
683 keep these strains separate for downstream analyses.

684

685 *Creation of two 18-way highly outcrossed populations*

686 MPPs created using multiple rounds of recombination can significantly increase the  
687 resolution of genetic mapping studies by virtue of haplotypes sampled from these  
688 population having a greater number of genetic breakpoints. Furthermore, multiple  
689 founders results in high levels of standing variation present in the MPP. These two  
690 features result in populations that more realistically mimic natural outbred diploid  
691 populations, and samples more functional alleles and haplotypes from the species as a  
692 whole than a two-way cross. With these goals in mind, we constructed a large, genetically  
693 heterogenous population by crossing 18 different founder strains (each strain being  
694 derived from the SGRP (Cubillos *et al.* 2009)). The 18 founder strains were chosen to  
695 represent a broad swathe of the natural diversity of the species and belong to diverse  
696 phylogenies, including: Wine/European, West African, North American, Sake, and  
697 Malaysian (see Table 1). It is also noteworthy that founder strains A1-4 and B1-4 are the  
698 same four strains using in (Cubillos *et al.* 2013), and were introduced into the population  
699 as both *Mat a* and *Mat α* mating types. We created two versions of our 18-way MPP. In  
700 both cases a full diallele cross was used to create all 121 unique diploid genotypes from  
701 11 *Mat a* and 11 *Mat α* strains (see Figure 1A and B). All 121 diploid genotypes were  
702 combined and the resulting population was taken through 12 rounds of sporulation  
703 followed by random mating to break up linkage disequilibrium. Previous work has shown  
704 that 12 rounds of random recombination breaks up haplotype blocks to the point where  
705 additional outcrossing does not significantly decrease LD (Parts *et al.* 2011). For brevity,  
706 the two different outcrossed populations will be referred to as 18F12v1 and 18F12v2,

707 respectively, throughout the rest of this manuscript. The version 1 MPP differed primarily  
708 from version 2 in that the 121 diploid genotypes obtained from the diallele were directly  
709 combined and sporulated *en masse* (version 1; Figure 1A) to create the MPP, as opposed  
710 to being individually carried through sporulation and spore disruption before being  
711 combined (version 2; Figure 1B). Furthermore, due to a technical artefact during the 12  
712 rounds of outcrossing, 18F12v1 is cross-contaminated with the 4-way F12 population  
713 from (Cubillos *et al.* 2013) which contains a functional URA3 gene. As a result, 18F12v1  
714 MPP is of limited utility for experiments that require uracil auxotrophy, and 18F12v2 is the  
715 current primary focus of work in our lab.

716

717

#### 718 *Development of an algorithm for accurately inferring haplotype frequencies*

719 In QTL mapping experiments using MPPs it is often advantageous to map QTLs back to  
720 founder haplotypes. In experiments derived from a two way cross between isogenic  
721 founders genotyping SNPs accomplishes this, but with multiple founders parental  
722 haplotypes have to be inferred in recombinant offspring (Mott *et al.* 2000). In a similar  
723 manner when MPPs are used as a base population and genetic changes detected  
724 following an experimental treatment it is often of value to examine changes in haplotype  
725 frequency (as done in (Burke *et al.* 2014) and reviewed in (Barghi and Schlötterer 2019)).  
726 We developed a sliding window haplotype caller that can be used in the situation when  
727 the founder haplotypes are known and apply it to both single haploid clones and pools  
728 consisting of millions of diploid individuals. This haplotype caller differs from other widely  
729 used callers (Long *et al.* 2011; Kessner *et al.* 2013) in that it acknowledges that in some

730 windows pairs of founders are poorly resolved or indistinguishable and relies solely on  
731 read counts at known SNP positions in both founders and recombinant populations.

732

733 To benchmark the haplotype-calling algorithm, we compared the frequency of SNPs  
734 private to a single founder to the haplotype frequency of the same founder for the interval  
735 closest to the SNP location in the 18F12v2 base population. Since this base population  
736 is sequenced to 2226X we initially wished to look at the error in the haplotype estimate at  
737 full coverage where the sampling variation on the SNP frequency estimate is quite low  
738 (proportional to  $1/\sqrt{2226}$  or  $<2\%$ ). For the high coverage base population regions  
739 showing large difference between SNP and haplotype frequency estimates likely  
740 represent instances where the haplotype caller breaks down, since we attempted to  
741 remove SNPs whose frequencies are poorly estimated. Figure S3, depicting the absolute  
742 difference in SNP versus haplotype frequency differences, shows that haplotype and SNP  
743 frequencies generally agree with one another with average and median error rates of  
744 0.4% and 0.2%, respectively (below the sampling error of SNP frequency).

745

746 Of course, typical experiments employing these base populations will sample the  
747 population following some treatment, and comparing haplotype frequencies in control  
748 versus treated samples. Although the 18F12v2 base population is sequenced to 2226X,  
749 it would be cost-effective if we could infer haplotype frequencies from pooled samples  
750 sequenced to much lower coverage. To determine the accuracy of our haplotype  
751 estimates as a function of sequencing coverage the 18F12v2 was down-sampled 50-fold  
752 and 100-fold, which corresponds to poolseq datasets of  $\sim 40X$  and  $\sim 20X$  respectively. We

753 then estimated relative haplotype frequency error rates as a function of sequence  
754 coverage (Figure S3b) and absolute error rates as a function of coverage and genomic  
755 location (Figure S4). It is apparent that the error rate is an increasing function of  
756 decreasing coverage, but for much of the genome the absolute error in haplotype  
757 frequency estimate is actually lower than the binomial sampling errors associated with  
758 directly estimating SNP frequencies at the same coverage (*i.e.*, at 20-40X coverage  
759 binomial sampling errors on frequency are >10%). It is also apparent that the average  
760 error rate is likely driven by a few regions where the haplotype caller struggles; these are  
761 presumably regions with poor divergence between founders in the window examined.  
762 Overall the mean (median) error rates on haplotype frequency estimates are low, 1.3%  
763 (0.8%) at 20X and 1% (0.6%) at 40X, respectively.

764

765

766 **Table 3.** Mean haplotype frequencies in 18F12v1 and 18F12v2

| Founder | 18F12v1_frequency | 18F12v2_frequency |
|---------|-------------------|-------------------|
| AB1     | 4.4%              | 1.2%              |
| AB2     | 3.8%              | 0.5%              |
| AB3     | 10.6%             | 41.4%             |
| AB4     | 5.8%              | 3.3%              |
| A5      | 1.2%              | 14.0%             |
| A6      | 0.8%              | 14.3%             |
| A7      | 2.4%              | 0.4%              |
| A8      | 1.2%              | 0.7%              |
| A9      | 0.1%              | 0.5%              |
| A11     | 9.9%              | 1.2%              |
| A12     | 18.1%             | 1.7%              |
| B5      | 27.1%             | 11.3%             |
| B7      | 1.1%              | 1.0%              |
| B8      | 0.5%              | 5.7%              |
| B9      | 0.9%              | 0.8%              |

|     |      |      |
|-----|------|------|
| B11 | 9.8% | 1.3% |
| B12 | 2.4% | 0.6% |

767

768 *Characterization of 18F12v1 and 18F12v2 base populations*

769 18F12v1 and 18F12v2 were subjected to high coverage whole-genome sequencing to  
770 both characterize their population structure and to establish a baseline for future mapping  
771 studies. Figures 5 and 6 show the inferred sliding window haplotype frequencies for  
772 18F12v1 and 18F12v2, respectively, while Table 3 shows the mean per founder  
773 haplotype frequencies genome-wide. One trend that is evident is that in both the 18F12v1  
774 and 18F12v2 MPPs a small number of founders are over-represented. In order to identify  
775 the origin of this bias, at least for 18F12v2, the first two meiotic generations of 18F12v2  
776 were sequenced (Figures S5 and S6; Table S5). Despite having an initially more balanced  
777 population after the first round of random mating, a few strains quickly became  
778 disproportionately over-represented. One possible explanation for this is that a few  
779 founding haplotypes were selected for early in the twelve rounds of intercrossing. Figure  
780 S7 provides suggestive evidence that this may have been the case, as the frequency of  
781 haplotypes derived from founder A5 increase genome-wide after the second round of  
782 meiosis. The latter half of chromosome XIII (from founder A5) emphasizes this point as it  
783 was very highly selected for initially. Another potential source of bias was the pooling  
784 strategy, which was done using optical density as a proxy for cell numbers. This may have  
785 resulted in an uneven distribution of founders in the initial pool. Nonetheless, after 12  
786 rounds of random mating, deep sequencing of 18F12v2 revealed that haplotypes from all  
787 founding strains were present in the population at a detectable frequency (Table 3).  
788 Specifically, haplotypes from ten or more founders were detected as segregating in over

789 99% of the genome in 18F12v2 and close to 98% of the genome in 18F12v1.  
790 Furthermore, 18F12v2 was verified to be auxotrophic for uracil, facilitating future  
791 manipulations for downstream analyses.

792

793 *Characterizing the recombination landscape of 18F12v1- and 18F12v2-derived*  
794 *segregants*

795 In order to further characterize 18F12v1 and 18F12v2, ten haploid segregants were  
796 generated from each diploid population and subjected to whole-genome sequencing. The  
797 complex structure of these populations is highlighted in Figure 7. The mean (median) size  
798 of haplotype blocks in 18F12v1-generated segregants was 103kb (66kb) while the mean  
799 (median) size of haplotype blocks in 18F12v2-generated segregants was 106kb (66kb)  
800 (Figure S8). The mean number of discrete haplotype blocks in 18F12v1-generated  
801 segregants was 106 as compared to 104 in 18F12v2-generated segregants. A previous  
802 study (Cubillos *et al.* 2013) found that twelve rounds of meiosis in a yeast 4-way cross  
803 resulted in a median block size of 23kb with 374 discrete haplotype blocks. Some of the  
804 failure to obtain the smaller block sizes and more numerous discrete blocks of this  
805 previous study may be due to undetectable recombination events occurring within  
806 haplotypes over-represented in our populations. Another possibility is that, due to the  
807 large number of founding haplotypes, recombination events were missed in regions at  
808 which multiple founding strains are highly genetically similar. It is also possible that some  
809 of the founding strains used in this study have relatively low natural recombination rates.

810

811 To highlight the diversity present in the two outbred populations, a close-up view of  
812 inferred haplotypes in segregants derived from each population at chromosome X is  
813 shown in Figure S9. Regions in which the founding haplotype is unknown tended to occur  
814 at the transitions between haplotypes (see Note S4) and are a mean (median) length of  
815 7.8kb (6kb) in 18F12v1-derived segregants and 7.5kb (6kb) in 18F12v2-derived  
816 segregants. Also noticeable is, at least for this chromosome, the larger amount of  
817 variation segregating in 18F12v2 (Figure S9B).

818

## 819 **Conclusion**

820 The paradigm of utilizing pairwise crosses to dissect the genetic basis of complex traits  
821 has enjoyed much success in diverse model organisms. However, such studies typically  
822 underestimate the standing variation present in natural populations and often lack the  
823 resolution to pin-point causal variants to a small number of genes. Conversely,  
824 association studies are typically underpowered to detect rare alleles, poorly tagged  
825 variants, and regions with multiple causal sites in weak LD with one another. MPPs have  
826 been proposed to bridge the gap between the above two approaches. Although MPPs  
827 have been created in several model systems, only a single MPP has thus far been  
828 described in budding yeast. By generating two large, highly outcrossed and genetically  
829 heterogeneous populations of *S. cerevisiae* derived from eighteen different founder  
830 strains, we have created a powerful resource that can be used in a variety of experimental  
831 settings. For instance, these populations can be used in large-scale X-QTL mapping  
832 experiments (Ehrenreich *et al.* 2010) to comprehensively dissect the genetic architecture  
833 of complex traits as well as large-scale evolve and re-sequence experiments (Lang *et al.*



834 2011; Parts *et al.* 2011; Burke *et al.* 2014) to determine the mechanisms and course of  
835 adaptation to diverse stimuli. Large number of recombinant haploid clones generated  
836 from these populations can be used in complementary large-scale I-QTL studies (Bloom  
837 *et al.* 2013; Wilkening *et al.* 2014). Due to the high levels of standing variation present,  
838 these populations should also prove to be a powerful resource in evolutionary engineering  
839 applications, as they are presumably capable of being evolved to carry out a plethora of  
840 useful tasks.

841

842 The haplotype calling software generated in this study represents a useful resource for  
843 the MPP community in general, as it enables highly accurate haplotype calling in poolseq  
844 data at reduced coverage. The ability of the algorithm to deal with windows where all  
845 founder haplotypes cannot be resolved will have utility in a subset of systems, including  
846 our yeast populations. Candidate causal regions can be identified by comparing  
847 haplotype frequencies at discrete intervals across the genome in control versus treatment  
848 populations. Candidate regions can then be examined in the UCSC genome browser,  
849 where genome-wide alignments of all founder strains have been posted. Structural  
850 variants can be easily visualized in the browser as can nonsynonymous SNPs, thus  
851 pointing investigators to potentially causal genes.

852

853 In conclusion, the populations generated in this study represent a novel resource that  
854 brings together the power of QTL mapping, the resolution of association studies, and a  
855 large amount of natural variation to a model system capable of teasing apart and directly  
856 testing the molecular underpinnings of complex traits.

857

858 **Acknowledgments**

859 We thank the UC Irvine Genomics High Throughput Facility for the quick turn-around  
860 and efficient processing of libraries for sequencing and for help with figuring out the  
861 parameters for the Covaris S220 Focused Acoustic Shearer. We would also like to  
862 acknowledge our funding source: NIH grant FG18445 to ADL.

863

864 **References**

- 865 Aylor, D. L., W. Valdar, W. Foulds-Mathes, R. J. Buus, R. A. Verdugo *et al.*, 2011  
866 Genetic analysis of complex traits in the emerging Collaborative Cross. *Genome*  
867 *Res.* 21: 1213–22.
- 868 Barghi, N., and C. Schlötterer, 2019 Shifting the paradigm in Evolve and Resequence  
869 studies: From analysis of single nucleotide polymorphisms to selected haplotype  
870 blocks. *Mol. Ecol.* 28: 521–524.
- 871 Berg, J. J., A. Harpak, N. Sinnott-Armstrong, A. M. Joergensen, H. Mostafavi *et al.*,  
872 2019 Reduced signal for polygenic adaptation of height in UK Biobank. *Elife* 8:.
- 873 Bloom, J. S., J. Boocock, S. Treusch, M. J. Sadhu, L. Day *et al.*, 2019 Rare variants  
874 contribute disproportionately to quantitative trait variation in yeast. *bioRxiv* 607291.
- 875 Bloom, J. S., I. M. Ehrenreich, W. Loo, T.-L. V. Lite, and L. Kruglyak, 2013 Finding the  
876 sources of missing heritability in a yeast cross. *Nature* 494: 234.
- 877 Bloom, J. S., I. Kotenko, M. J. Sadhu, S. Treusch, F. W. Albert *et al.*, 2015 Genetic  
878 interactions contribute less than additive effects to quantitative trait variation in  
879 yeast. *Nat Commun* 6: 8712.
- 880 Burke, M. K., G. Liti, and A. D. Long, 2014 Standing genetic variation drives repeatable

- 881 experimental evolution in outcrossing populations of *Saccharomyces cerevisiae*.  
882 *Mol. Biol. Evol.* 31: 3228–39.
- 883 Chakraborty, M., J. G. Baldwin-Brown, A. D. Long, and J. J. Emerson, 2016 Contiguous  
884 and accurate *de novo* assembly of metazoan genomes with modest long read  
885 coverage. *Nucleic Acids Res.* 44: gkw654.
- 886 Chakraborty, M., J. J. Emerson, S. J. Macdonald, and A. D. Long, 2019 Structural  
887 variants exhibit widespread allelic heterogeneity and shape variation in complex  
888 traits. *Nat. Commun.* 10:.
- 889 Chen, G.-B., S. H. Lee, M. R. Robinson, M. Trzaskowski, Z.-X. Zhu *et al.*, 2017 Across-  
890 cohort QC analyses of GWAS summary statistics from complex traits. *Eur. J. Hum.*  
891 *Genet.* 25: 137–146.
- 892 Cingolani, P., A. Platts, L. L. Wang, M. Coon, T. Nguyen *et al.*, 2012 A program for  
893 annotating and predicting the effects of single nucleotide polymorphisms, SnpEff:  
894 SNPs in the genome of *Drosophila melanogaster* strain w1118; iso-2; iso-3. *Fly*  
895 (Austin). 6: 80–92.
- 896 Cubillos, F. A., C. Brice, J. Molinet, S. Tisé, V. Abarca *et al.*, 2017 Identification of  
897 Nitrogen Consumption Genetic Variants in Yeast Through QTL Mapping and Bulk  
898 Segregant RNA-Seq Analyses. *G3 (Bethesda)*. 7: 1693–1705.
- 899 Cubillos, F. A., E. J. Louis, and G. Liti, 2009 Generation of a large set of genetically  
900 tractable haploid and diploid *Saccharomyces* strains. *FEMS Yeast Res.* 9:  
901 1217–1225.
- 902 Cubillos, F. A., L. Parts, F. Salinas, A. Bergström, E. Scovacicchi *et al.*, 2013 High-  
903 resolution mapping of complex traits with a four-parent advanced intercross yeast

904 population. *Genetics* 195: 1141–55.

905 Cullen, P. J., W. Sabbagh, E. Graham, M. M. Irick, E. K. Van Olden *et al.*, 2004 A  
906 signaling mucin at the head of the Cdc42- and MAPK-dependent filamentous  
907 growth pathway in yeast. *Genes Dev.* 18: 1695–1708.

908 Dimitrov, L. N., R. B. Brem, L. Kruglyak, and D. E. Gottschling, 2009 Polymorphisms in  
909 multiple genes contribute to the spontaneous mitochondrial genome instability of  
910 *Saccharomyces cerevisiae* S288C strains. *Genetics* 183: 365–383.

911 Ehrenreich, I. M., N. Torabi, Y. Jia, J. Kent, S. Martis *et al.*, 2010 Dissection of  
912 genetically complex traits with extremely large pools of yeast segregants. *Nature*  
913 464: 1039–42.

914 Flint, J., and R. Mott, 2001 Finding the molecular basis of quantitative traits: successes  
915 and pitfalls. *Nat. Rev. Genet.* 2: 437–445.

916 Garrison, E., and G. Marth, 2012a Haplotype-based variant detection from short-read  
917 sequencing.

918 Garrison, E., and G. Marth, 2012b Haplotype-based variant detection from short-read  
919 sequencing.

920 Gimble, F. S., and J. Thorner, 1992 Homing of a DNA endonuclease gene by meiotic  
921 gene conversion in *Saccharomyces cerevisiae*. *Nature* 357: 301–306.

922 Hehir-Kwa, J. Y., T. Marschall, W. P. Kloosterman, L. C. Francioli, J. A. Baaijens *et al.*,  
923 2016 A high-quality human reference panel reveals the complexity and distribution  
924 of genomic structural variants. *Nat. Commun.* 7: 12989.

925 Huang, X., M.-J. Paulo, M. Boer, S. Effgen, P. Keizer *et al.*, 2011 Analysis of natural  
926 allelic variation in *Arabidopsis* using a multiparent recombinant inbred line

927 population. Proc. Natl. Acad. Sci. U. S. A. 108: 4488.

928 Kane, P. M., 2007 The long physiological reach of the yeast vacuolar H<sup>+</sup>-ATPase. J.

929 Bioenerg. Biomembr. 39: 415–421.

930 Kessner, D., T. L. Turner, and J. Novembre, 2013 Maximum Likelihood Estimation of

931 Frequencies of Known Haplotypes from Pooled Sequence Data. Mol. Biol. Evol. 30:

932 1145–1158.

933 King, E. G., S. J. Macdonald, and A. D. Long, 2012a Properties and power of the

934 Drosophila Synthetic Population Resource for the routine dissection of complex

935 traits. Genetics 191: 935–49.

936 King, E. G., C. M. Merkes, C. L. McNeil, S. R. Hooper, S. Sen *et al.*, 2012b Genetic

937 dissection of a model complex trait using the Drosophila Synthetic Population

938 Resource. Genome Res. 22: 1558–66.

939 de Koning, D.-J., and L. M. McIntyre, 2017 Back to the Future: Multiparent Populations

940 Provide the Key to Unlocking the Genetic Basis of Complex Traits. Genetics 206:

941 527–529.

942 Koren, S., B. P. Walenz, K. Berlin, J. R. Miller, N. H. Bergman *et al.*, 2017 Canu:

943 scalable and accurate long-read assembly via adaptive k-mer weighting and repeat

944 separation. Genome Res. 27: 722–736.

945 Kover, P. X., W. Valdar, J. Trakalo, N. Scarcelli, I. M. Ehrenreich *et al.*, 2009 A

946 Multiparent Advanced Generation Inter-Cross to Fine-Map Quantitative Traits in

947 Arabidopsis thaliana (R. Mauricio, Ed.). PLoS Genet. 5: e1000551.

948 Kowalec, P., M. Grynberg, B. Pajak, A. Socha, K. Winiarska *et al.*, 2015a Newly

949 identified protein Imi1 affects mitochondrial integrity and glutathione homeostasis in

- 950        *Saccharomyces cerevisiae*. FEMS Yeast Res. 15:.
- 951    Kowalec, P., M. Grynberg, B. Pająk, A. Socha, K. Winiarska *et al.*, 2015b Newly  
952        identified protein Imi1 affects mitochondrial integrity and glutathione homeostasis in  
953        *Saccharomyces cerevisiae* (I. Dawes, Ed.). FEMS Yeast Res. 15: fov048.
- 954    Lander, E. S., and D. Botstein, 1989 Mapping mendelian factors underlying quantitative  
955        traits using RFLP linkage maps. Genetics 121: 185–99.
- 956    Lang, G. I., D. Botstein, and M. M. Desai, 2011 Genetic variation and the fate of  
957        beneficial mutations in asexual populations. Genetics 188: 647–661.
- 958    Langmead, B., and S. L. Salzberg, 2012 Fast gapped-read alignment with Bowtie 2.  
959        Nat. Methods 9: 357–359.
- 960    Li, H., 2011 A statistical framework for SNP calling, mutation discovery, association  
961        mapping and population genetical parameter estimation from sequencing data.  
962        Bioinformatics 27: 2987–2993.
- 963    Li, H., 2013 Aligning sequence reads, clone sequences and assembly contigs with  
964        BWA-MEM.
- 965    Li, H., and R. Durbin, 2009 Fast and accurate short read alignment with Burrows-  
966        Wheeler transform. Bioinformatics 25: 1754–1760.
- 967    Li, H., B. Handsaker, A. Wysoker, T. Fennell, J. Ruan *et al.*, 2009 The Sequence  
968        Alignment/Map format and SAMtools. Bioinformatics 25: 2078–2079.
- 969    Liti, G., and E. J. Louis, 2012 Advances in quantitative trait analysis in yeast. PLoS  
970        Genet. 8: e1002912.
- 971    Long, Q., D. C. Jeffares, Q. Zhang, K. Ye, V. Nizhynska *et al.*, 2011 PoolHap: Inferring  
972        Haplotype Frequencies from Pooled Samples by Next Generation Sequencing (T.

973 Mailund, Ed.). PLoS One 6: e15292.

974 Long, A. D., S. J. Macdonald, and E. G. King, 2014 Dissecting complex traits using the  
975 *Drosophila* Synthetic Population Resource. Trends Genet. 30: 488–495.

976 Macdonald, S. J., and A. D. Long, 2007 Joint estimates of quantitative trait locus effect  
977 and frequency using synthetic recombinant populations of *Drosophila*  
978 *melanogaster*. Genetics 176: 1261–81.

979 Mackay, T. F., 2001 The genetic architecture of quantitative traits. Annu Rev Genet 35:  
980 303–339.

981 Manolio, T. A., F. S. Collins, N. J. Cox, D. B. Goldstein, L. A. Hindorff *et al.*, 2009  
982 Finding the missing heritability of complex diseases. Nature 461: 747–753.

983 Marçais, G., A. L. Delcher, A. M. Phillippy, R. Coston, S. L. Salzberg *et al.*, 2018  
984 MUMmer4: A fast and versatile genome alignment system (A. E. Darling, Ed.).  
985 PLOS Comput. Biol. 14: e1005944.

986 Märtens, K., J. Hallin, J. Warringer, G. Liti, and L. Parts, 2016 Predicting quantitative  
987 traits from genome and phenome with near perfect accuracy. Nat. Commun. 7:  
988 11512.

989 McDonald, M. J., D. P. Rice, and M. M. Desai, 2016 Sex speeds adaptation by altering  
990 the dynamics of molecular evolution. Nature 531: 233–236.

991 McMullen, M. D., S. Kresovich, H. S. Villeda, P. Bradbury, H. Li *et al.*, 2009 Genetic  
992 properties of the maize nested association mapping population. Science 325: 737–  
993 40.

994 Meersche, K. Van den, K. Soetaert, and D. Van Oevelen, 2009 `xsample()`: An R  
995 Function for Sampling Linear Inverse Problems . J. Stat. Softw. 30:.

- 996 Mott, R., C. J. Talbot, M. G. Turri, A. C. Collins, and J. Flint, 2000 A method for fine  
997 mapping quantitative trait loci in outbred animal stocks. *Proc. Natl. Acad. Sci. U. S.*  
998 *A.* 97: 12649–54.
- 999 Narasimhan, V., P. Danecek, A. Scally, Y. Xue, C. Tyler-Smith *et al.*, 2016  
1000 BCFtools/RoH: A hidden Markov model approach for detecting autozygosity from  
1001 next-generation sequencing data. *Bioinformatics* 32: 1749–1751.
- 1002 Navarro-Aviño, J. P., R. Prasad, V. J. Miralles, R. M. Benito, and R. Serrano, 1999 A  
1003 proposal for nomenclature of aldehyde dehydrogenases in *Saccharomyces*  
1004 *cerevisiae* and characterization of the stress-inducible ALD2 and ALD3 genes.  
1005 *Yeast* 15: 829–842.
- 1006 Noble, L. M., M. V. Rockman, and H. Teotónio, 2019 Gene-level quantitative trait  
1007 mapping in an expanded *C. elegans* multiparent experimental evolution panel.  
1008 *bioRxiv* 589432.
- 1009 O’Rourke, S. M., and I. Herskowitz, 2002 A Third Osmosensing Branch in  
1010 *Saccharomyces cerevisiae* Requires the Msb2 Protein and Functions in Parallel  
1011 with the Sho1 Branch. *Mol. Cell. Biol.* 22: 4739–4749.
- 1012 Parts, L., F. A. Cubillos, J. Warringer, K. Jain, F. Salinas *et al.*, 2011 Revealing the  
1013 genetic structure of a trait by sequencing a population under selection. *Genome*  
1014 *Res* 21: 1131–1138.
- 1015 Paten, B., M. Diekhans, D. Earl, J. S. John, J. Ma *et al.*, 2011a Cactus graphs for  
1016 genome comparisons, pp. 469–481 in *Journal of Computational Biology*,.
- 1017 Paten, B., D. Earl, N. Nguyen, M. Diekhans, D. Zerbino *et al.*, 2011b Cactus: Algorithms  
1018 for genome multiple sequence alignment. *Genome Res.* 21: 1512–1528.



- 1019 Pritchard, J. K., 2001 Are Rare Variants Responsible for Susceptibility to Complex  
1020 Diseases? *Am. J. Hum. Genet.* 69: 124–137.
- 1021 Ruckstuhl, C., C. Netzberger, I. Entfellner, D. Carmona-Gutierrez, T. Kickenweiz *et*  
1022 *al.*, 2014 Lifespan Extension by Methionine Restriction Requires Autophagy-  
1023 Dependent Vacuolar Acidification. *PLoS Genet.* 10:.
- 1024 Sebastiani, P., N. Solovieff, A. Puca, S. W. Hartley, E. Melista *et al.*, 2011 Retraction.  
1025 *Science* 333: 404.
- 1026 Solares, E. A., M. Chakraborty, D. E. Miller, S. Kalsow, K. Hall *et al.*, 2018 Rapid Low-  
1027 Cost Assembly of the *Drosophila melanogaster* Reference Genome Using Low-  
1028 Coverage, Long-Read Sequencing. *G3 (Bethesda)*. 8: 3143–3154.
- 1029 Spencer, C. C. A., Z. Su, P. Donnelly, and J. Marchini, 2009 Designing Genome-Wide  
1030 Association Studies: Sample Size, Power, Imputation, and the Choice of  
1031 Genotyping Chip (J. D. Storey, Ed.). *PLoS Genet.* 5: e1000477.
- 1032 Tan, A., G. R. Abecasis, and H. M. Kang, 2015 Unified representation of genetic  
1033 variants. *Bioinformatics* 31: 2202–2204.
- 1034 The Collaborative Cross, a community resource for the genetic analysis of complex  
1035 traits, 2004 *Nat. Genet.* 36: 1133–1137.
- 1036 Thornton, K. R., A. J. Foran, and A. D. Long, 2013 Properties and Modeling of GWAS  
1037 when Complex Disease Risk Is Due to Non-Complementing, Deleterious Mutations  
1038 in Genes of Large Effect (J. K. Pritchard, Ed.). *PLoS Genet.* 9: e1003258.
- 1039 Threadgill, D. W., and G. A. Churchill, 2012 Ten years of the Collaborative Cross.  
1040 *Genetics* 190: 291–4.
- 1041 Tkach, J. M., A. Yimit, A. Y. Lee, M. Riffle, M. Costanzo *et al.*, 2012 Dissecting DNA

1042 damage response pathways by analysing protein localization and abundance  
1043 changes during DNA replication stress. *Nat. Cell Biol.* 14: 966–976.

1044 Visscher, P. M., 2008 Sizing up human height variation. *Nat. Genet.* 40: 489–490.

1045 Walker, B. J., T. Abeel, T. Shea, M. Priest, A. Abouelliel *et al.*, 2014 Pilon: An Integrated  
1046 Tool for Comprehensive Microbial Variant Detection and Genome Assembly  
1047 Improvement (J. Wang, Ed.). *PLoS One* 9: e112963.

1048 Waterhouse, R. M., M. Seppey, F. A. Simão, M. Manni, P. Ioannidis *et al.*, 2018 BUSCO  
1049 Applications from Quality Assessments to Gene Prediction and Phylogenomics.  
1050 *Mol. Biol. Evol.* 35: 543–548.

1051 Wilkening, S., G. Lin, E. S. Fritsch, M. M. Tekkedil, S. Anders *et al.*, 2014 An evaluation  
1052 of high-throughput approaches to QTL mapping in *Saccharomyces cerevisiae*.  
1053 *Genetics* 196: 853–865.

1054 WTCCC, 2007 Genome-wide association study of 14,000 cases of seven common  
1055 diseases and 3,000 shared controls. *Nature* 447: 661–678.

1056 Ye, C., C. M. Hill, S. Wu, J. Ruan, and Z. Ma, 2016 DBG2OLC: Efficient Assembly of  
1057 Large Genomes Using Long Erroneous Reads of the Third Generation Sequencing  
1058 Technologies. *Sci. Rep.* 6: 31900.

1059 Yue, J.-X., J. Li, L. Aigrain, J. Hallin, K. Persson *et al.*, 2017 Contrasting evolutionary  
1060 genome dynamics between domesticated and wild yeasts. *Nat. Genet.* 49: 913–  
1061 924.

1062

1063

**A**

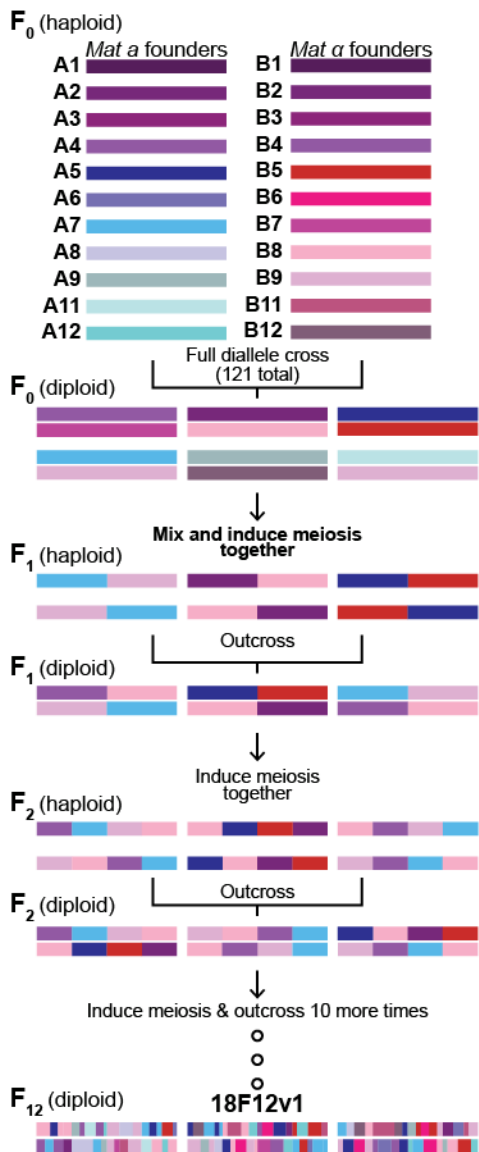

**B**

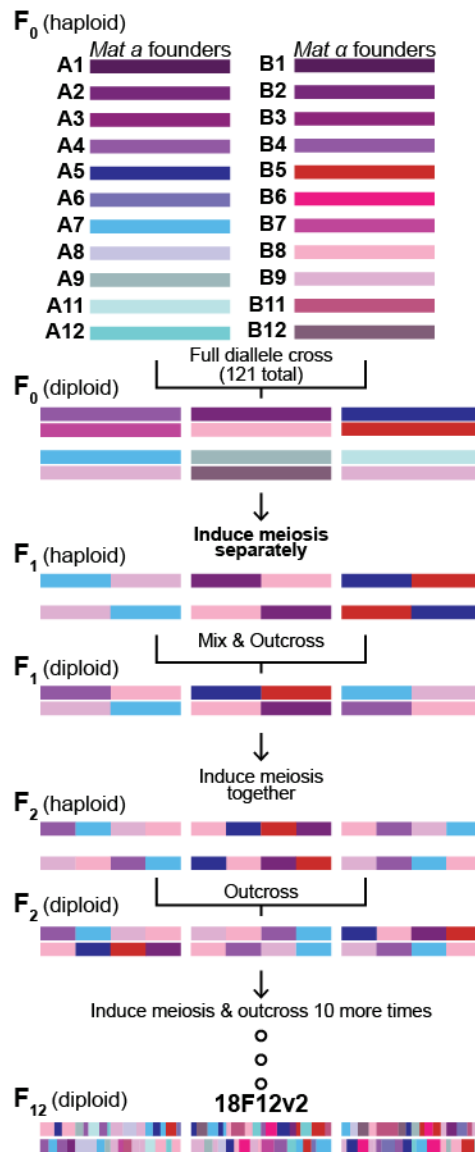

1064

1065 **Figure 1.** Schematic of the outcrossing process used to make the two 18F12 diploid  
 1066 populations. Both populations were established by a full diallele cross of all 22 isogenic  
 1067 haploid founder strains. A1/B1, A2/B2, A3/B3, and A4/B4 are different mating types of  
 1068 the same strains and are the same strains used in (Cubillos *et al.* 2013). In **(A)**, all  
 1069 pairwise crosses were mixed before the first round of sporulation. This is in contrast to  
 1070 **(B)**, in which mixing did not occur until after an initial sporulation event. In both cases,

1071 mixed populations were taken through additional rounds of sporulation and random  
1072 mating for a total of 12 meiotic generations.

1073

1074

1075

1076

1077

1078

1079

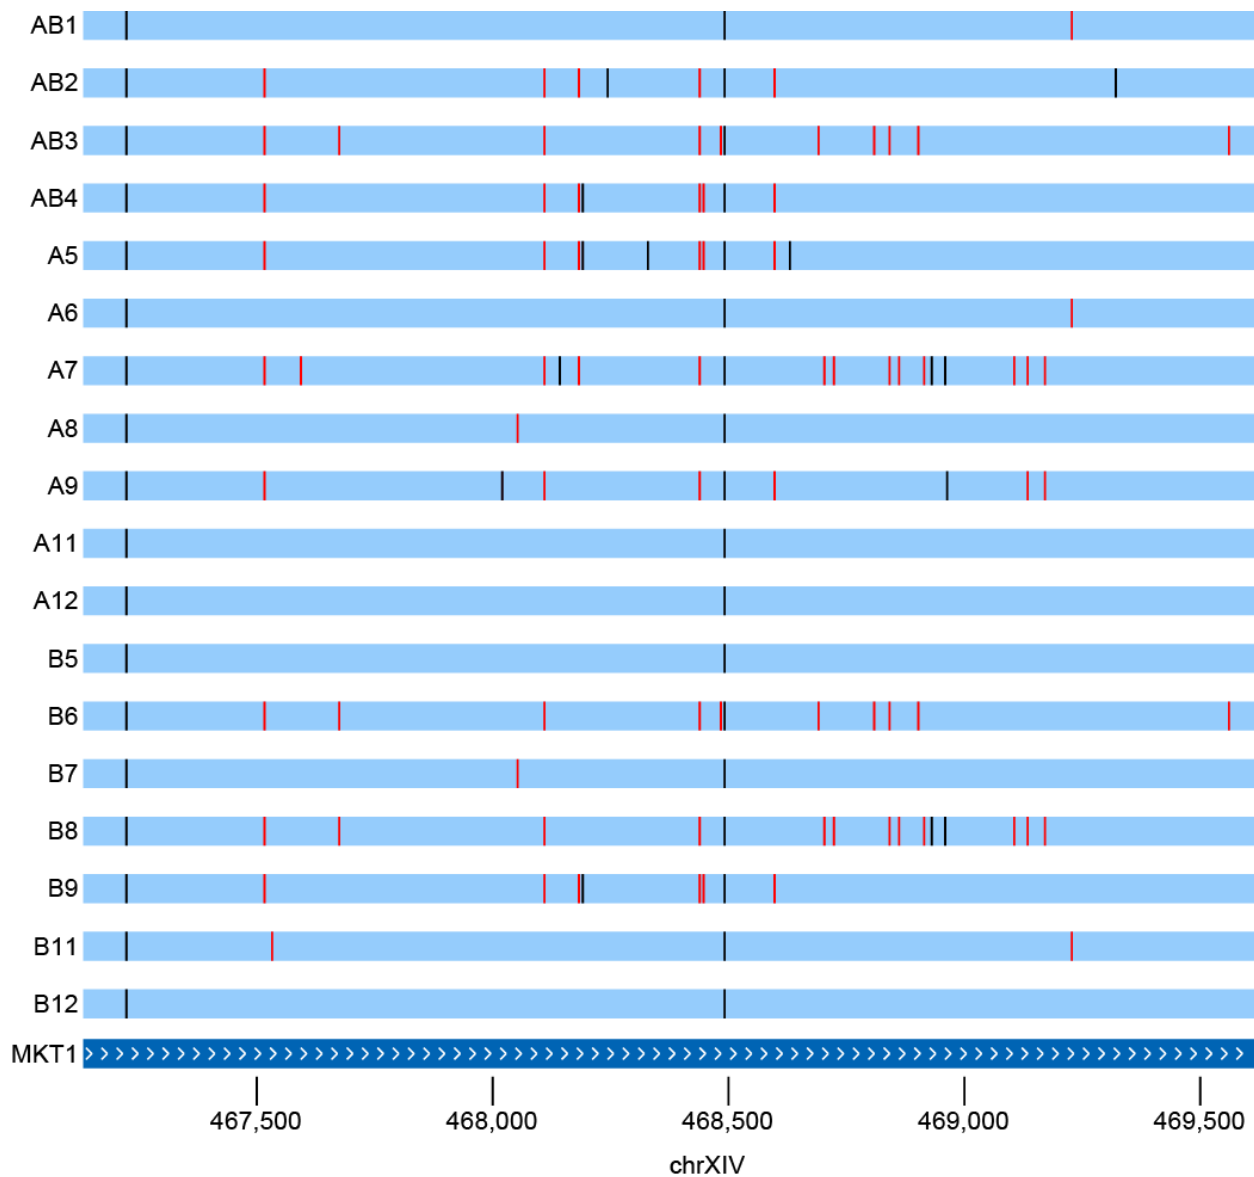

1080  
1081 **Figure 2.** Many alleles of the highly pleiotropic *MKT1* gene are segregating amongst the  
1082 founder strains, highlighting the potential of uncovering complex allelic series using  
1083 populations derived from these strains. Seven of these alleles are differentiated by  
1084 nonsynonymous SNPs, of which six are predicted to be segregating in 18F12v2.  
1085 Vertical red lines are synonymous SNP differences from the reference S288C strain,  
1086 and black bars nonsynonymous SNPs.  
1087

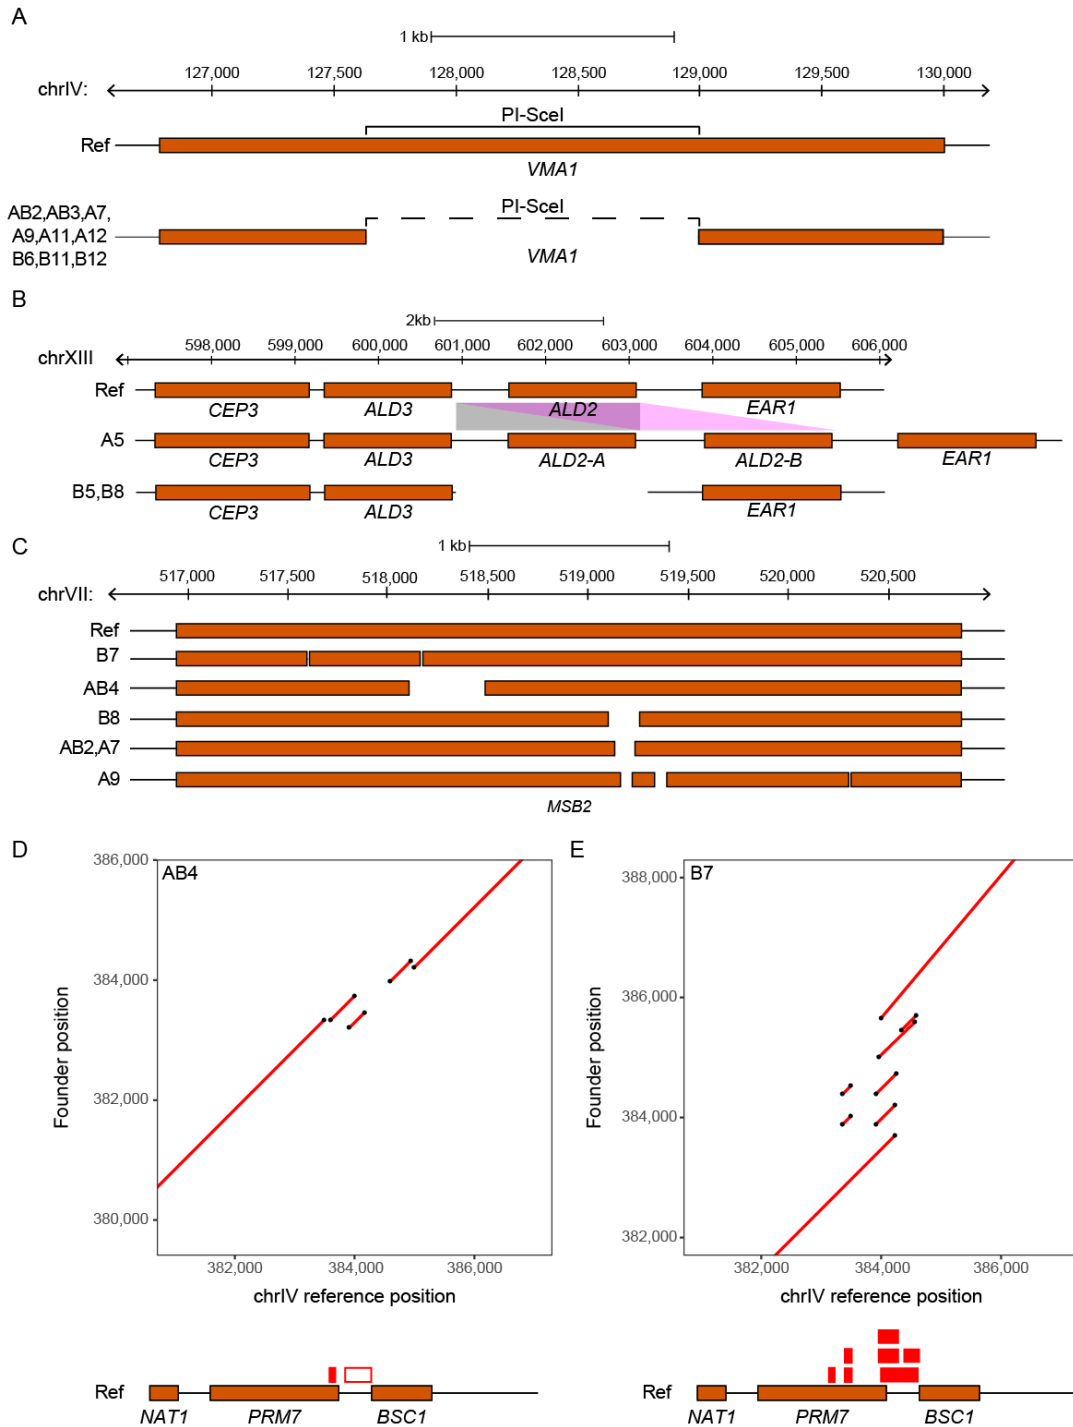

1088

1089 **Figure 3.** Combining contiguous long-read sequencing with accurate short-read data  
1090 enables the detection of structural variants such as those depicted above. In **(A)**, a large  
1091 (>1kb) deletion within a vacuolar ATPase (*VMA1*) is present in half of the strains used in  
1092 this study. This deletion directly overlaps the self-splicing intein, PI-SceI. Copy number

1093 variants of *ALD2*, an aldehyde dehydrogenase, were detected (**B**) and include a  
1094 duplication of this gene in founder A5 (represented as *ALD2-A* and *ALD2-B*) as well as  
1095 its' deletion in founders B5 and B8. In (**C**), multiple deletions of different lengths in the  
1096 osmosensor *MSB2* were detected in multiple founder strains. Dotplots of a structurally  
1097 complex region on Chromosome IV are shown for founders AB4 (**D**) and B7 (**E**). These  
1098 plots show alignments of regions from the founder strains (depicted on the y axis) with  
1099 the corresponding region from the S288C reference strain (depicted on the x axis). The  
1100 red boxes present above the genes in the reference strain map duplications (solid  
1101 boxes) and deletions (empty boxes) detected in each founder strain to the  
1102 corresponding reference sequence. In all panels, the reference strain S288C (aka 'Ref')  
1103 is used to highlight the various arrangements of SVs present in the founder strains.  
1104  
1105

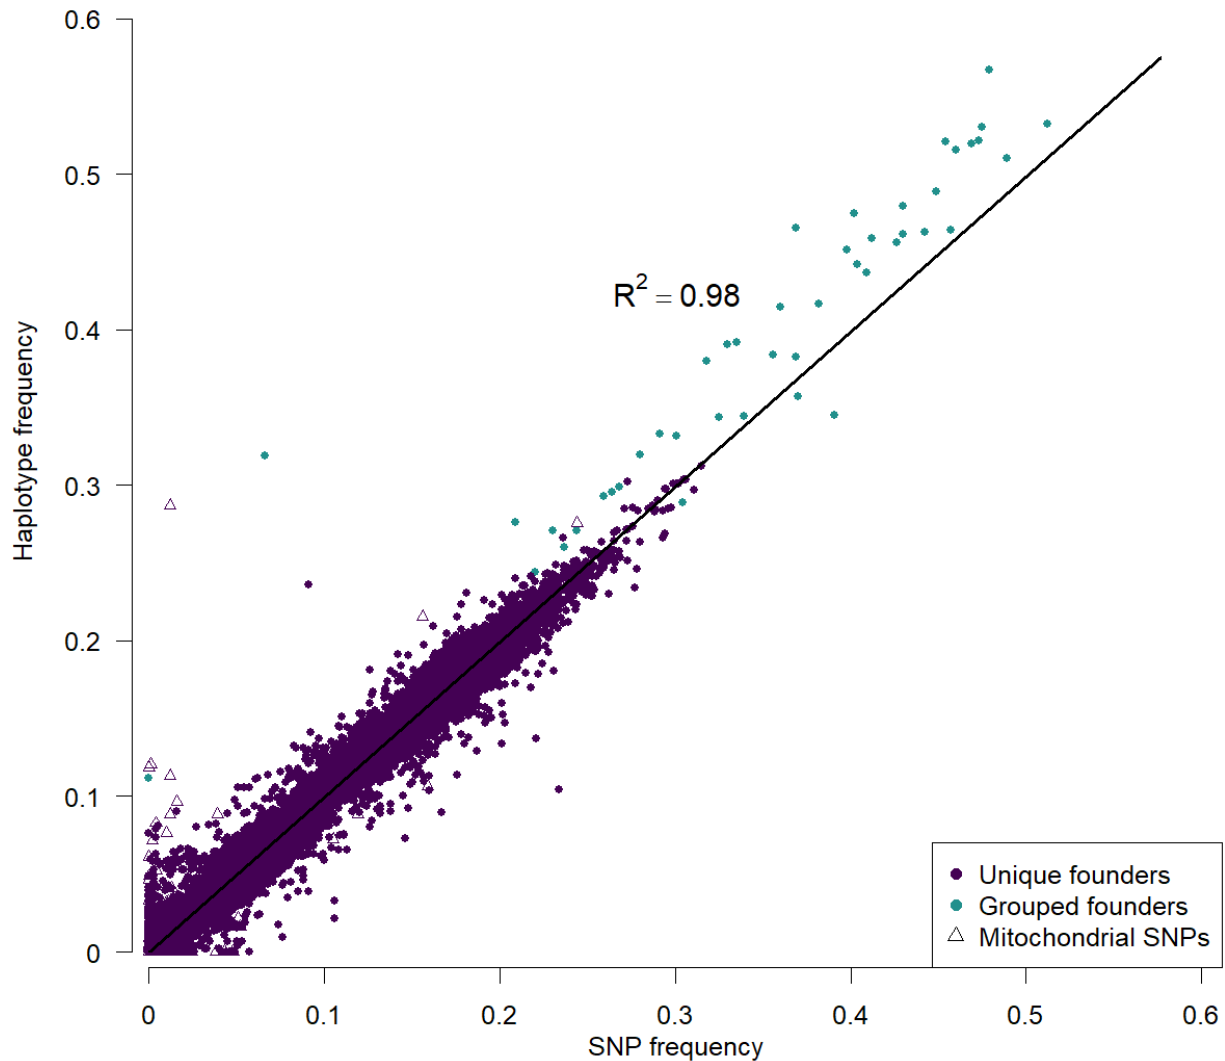

1106

1107 **Figure 4.** The frequency of SNPs private to a single founder are highly correlated with  
1108 the estimated haplotype frequencies at these SNPs in 18F12v2. As the frequency of a  
1109 private SNP should be equal to the corresponding haplotype frequency, this measure  
1110 provides a benchmark with which the accuracy of our haplotype caller can be  
1111 measured. Cyan points represent founders that were pooled when estimating haplotype  
1112 frequencies (“grouped founder”) due to the high degree of sequence similarity between



1113 their genomes. Triangles represent mitochondrial SNPs, which, together with SNPs  
1114 private to pooled founders, represent the bulk of the major outliers. The coefficient of  
1115 determination was calculated by regressing haplotype frequency onto SNP frequency,  
1116 excluding SNPs from grouped founders and mitochondrial SNPs.

1117

1118

1119

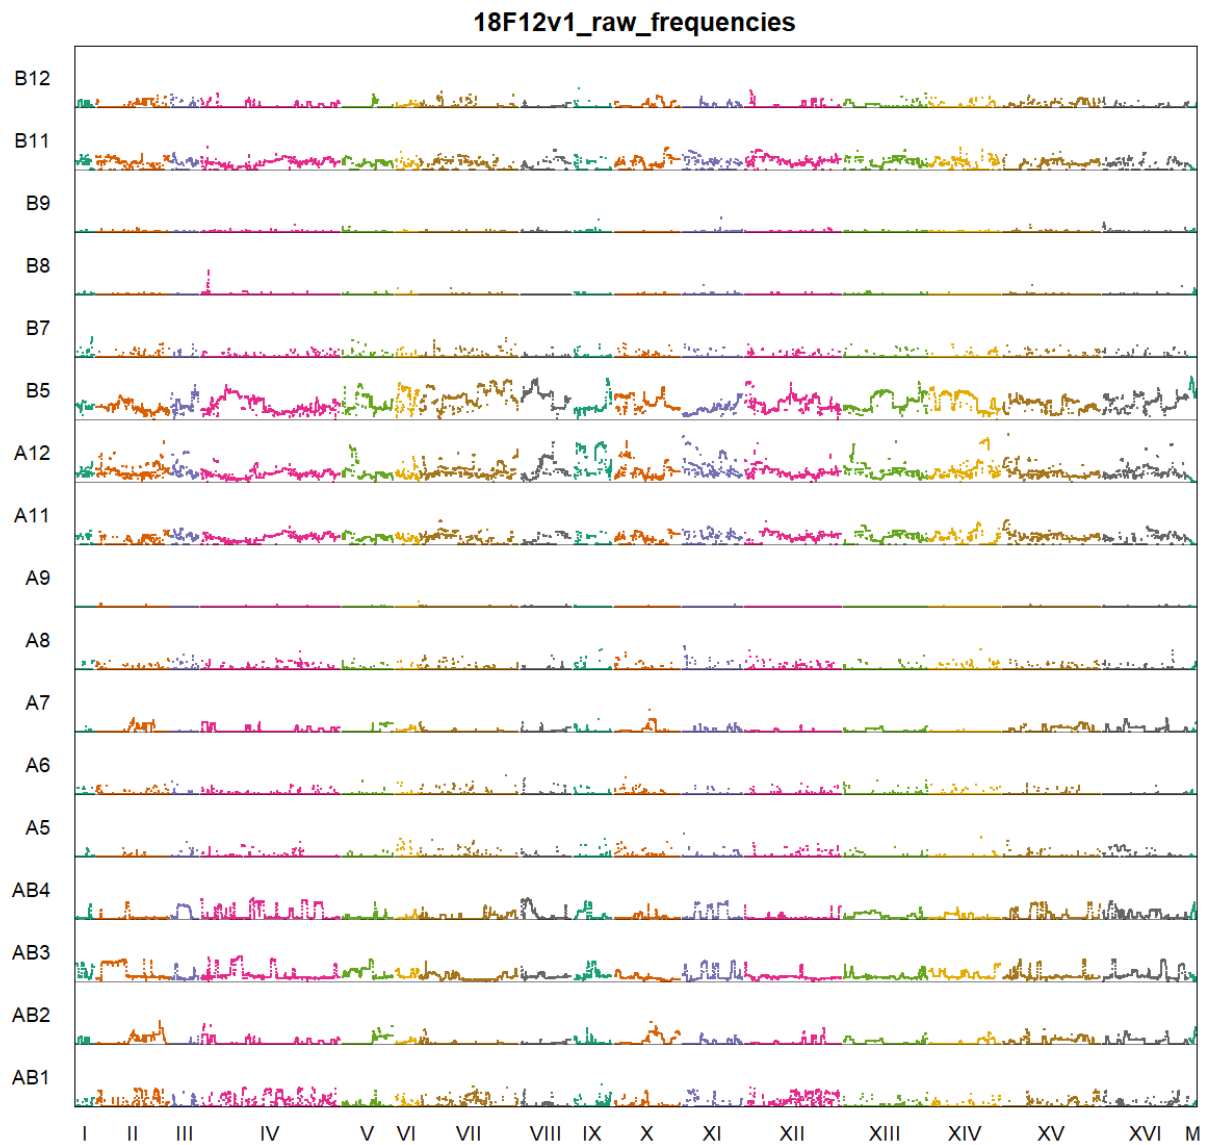

1120

1121 **Figure 5.** Genome-wide haplotype frequencies for 18F12v1.

1122

1123

1124

1125

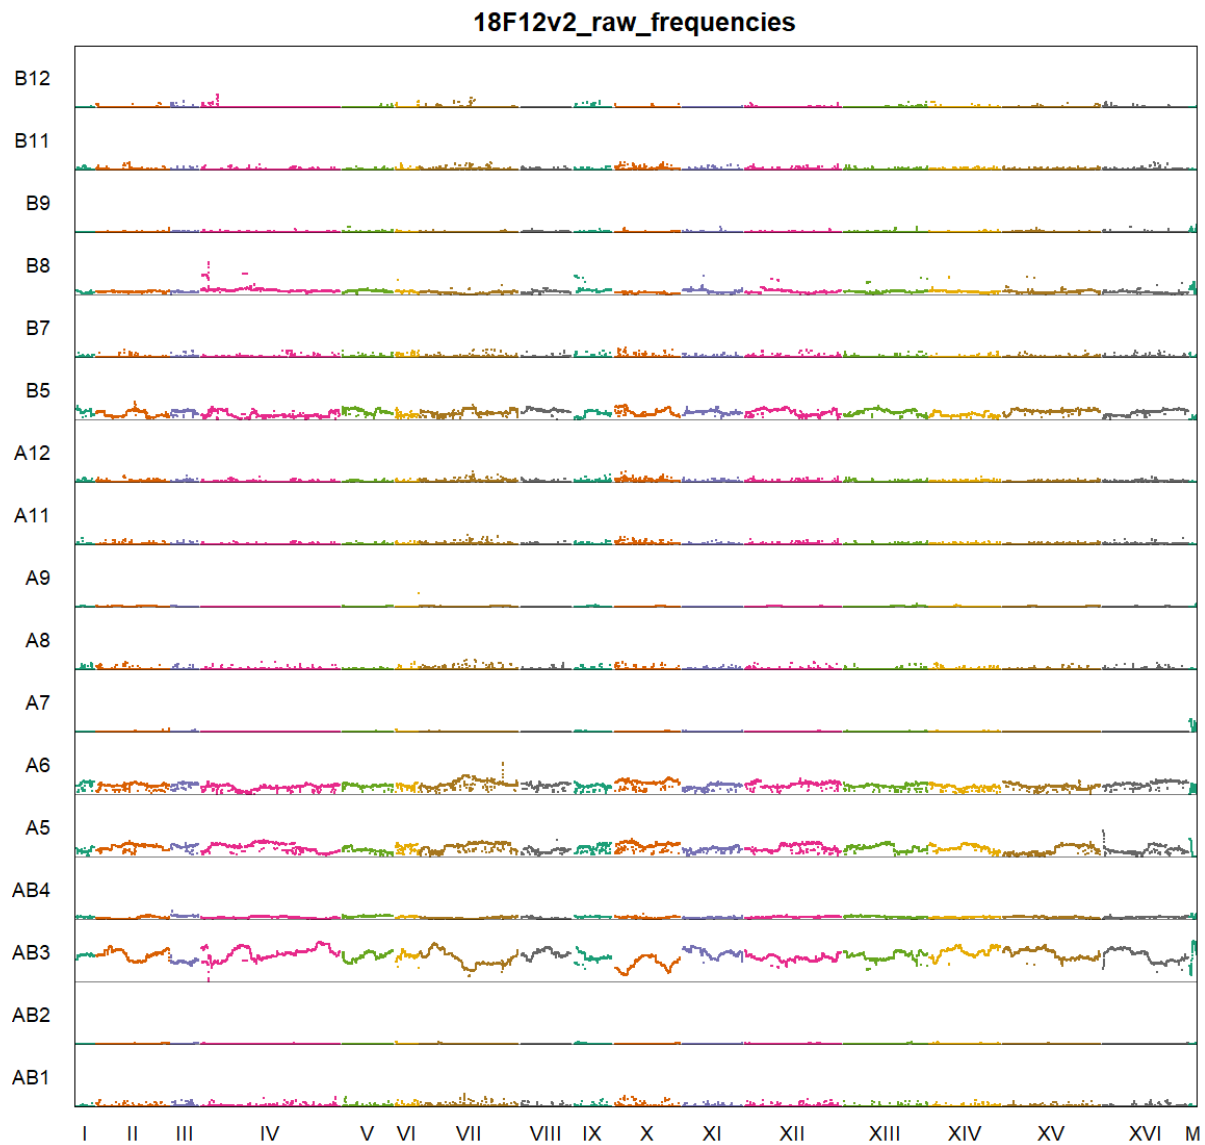

1126

1127 **Figure 6.** Genome-wide haplotype frequencies for 18F12v2.

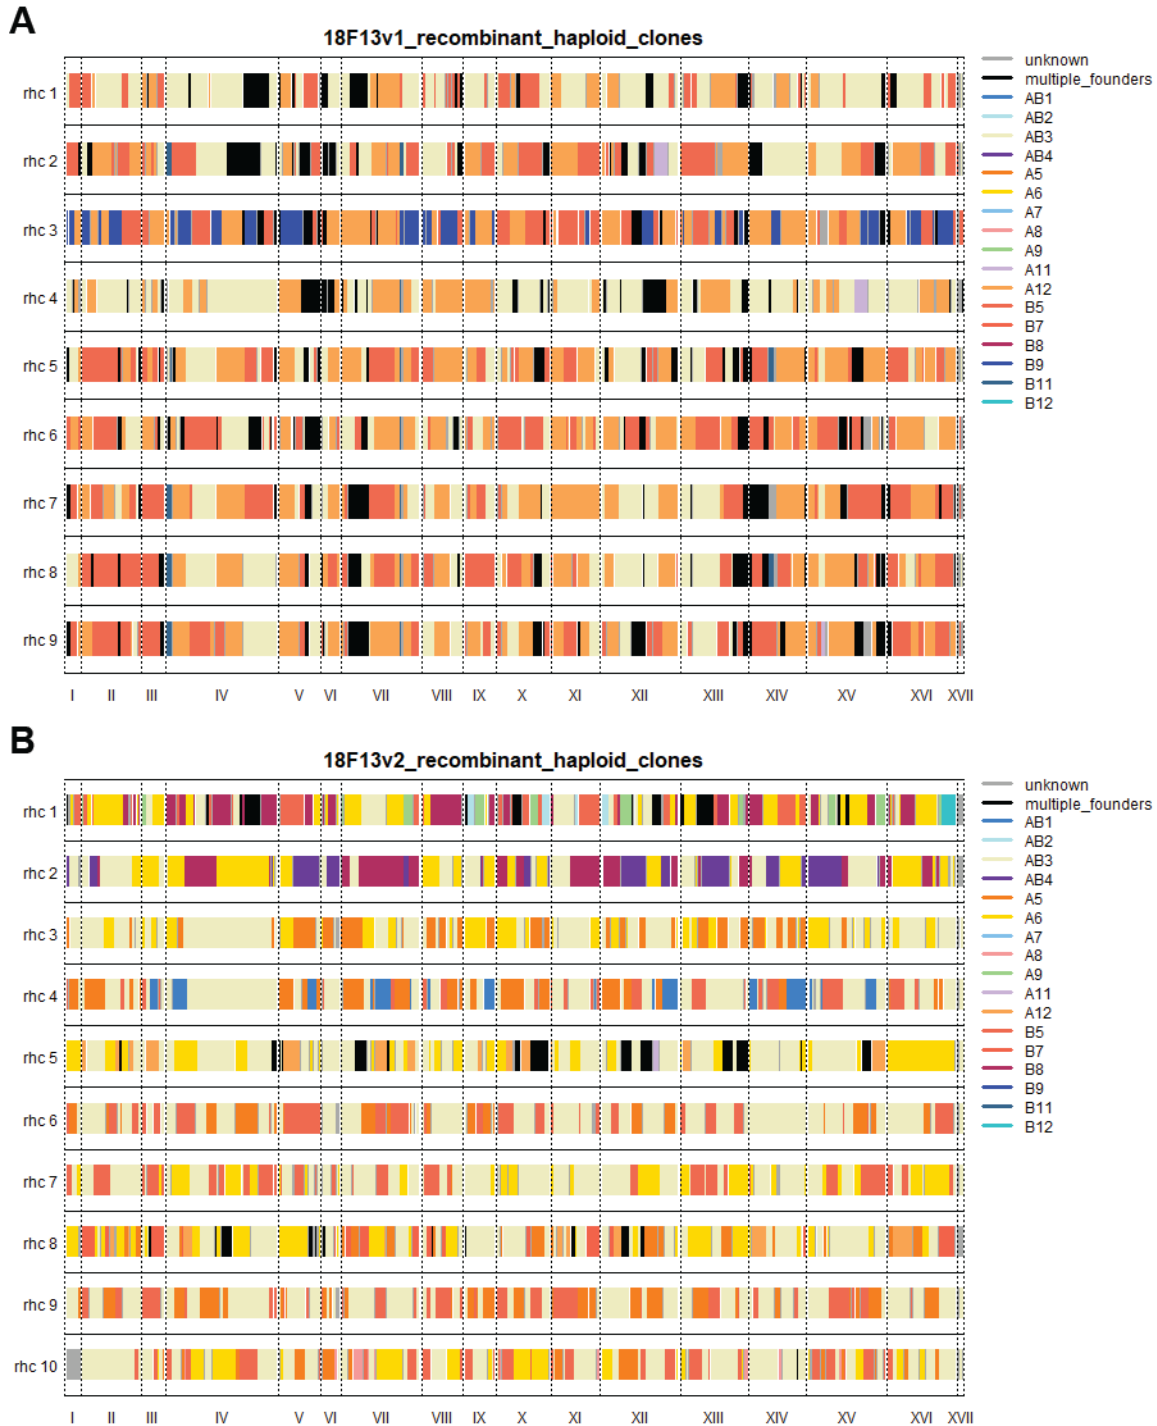

1128

1129 **Figure 7.** Haploids derived from 18F12v1 (**A**) and 18F12v2 (**B**) were isolated and

1130 sequenced, providing a glimpse into the recombinogenic landscape and haplotype

1131 diversity present within these populations.

1132  
1133

### Supplementary Information

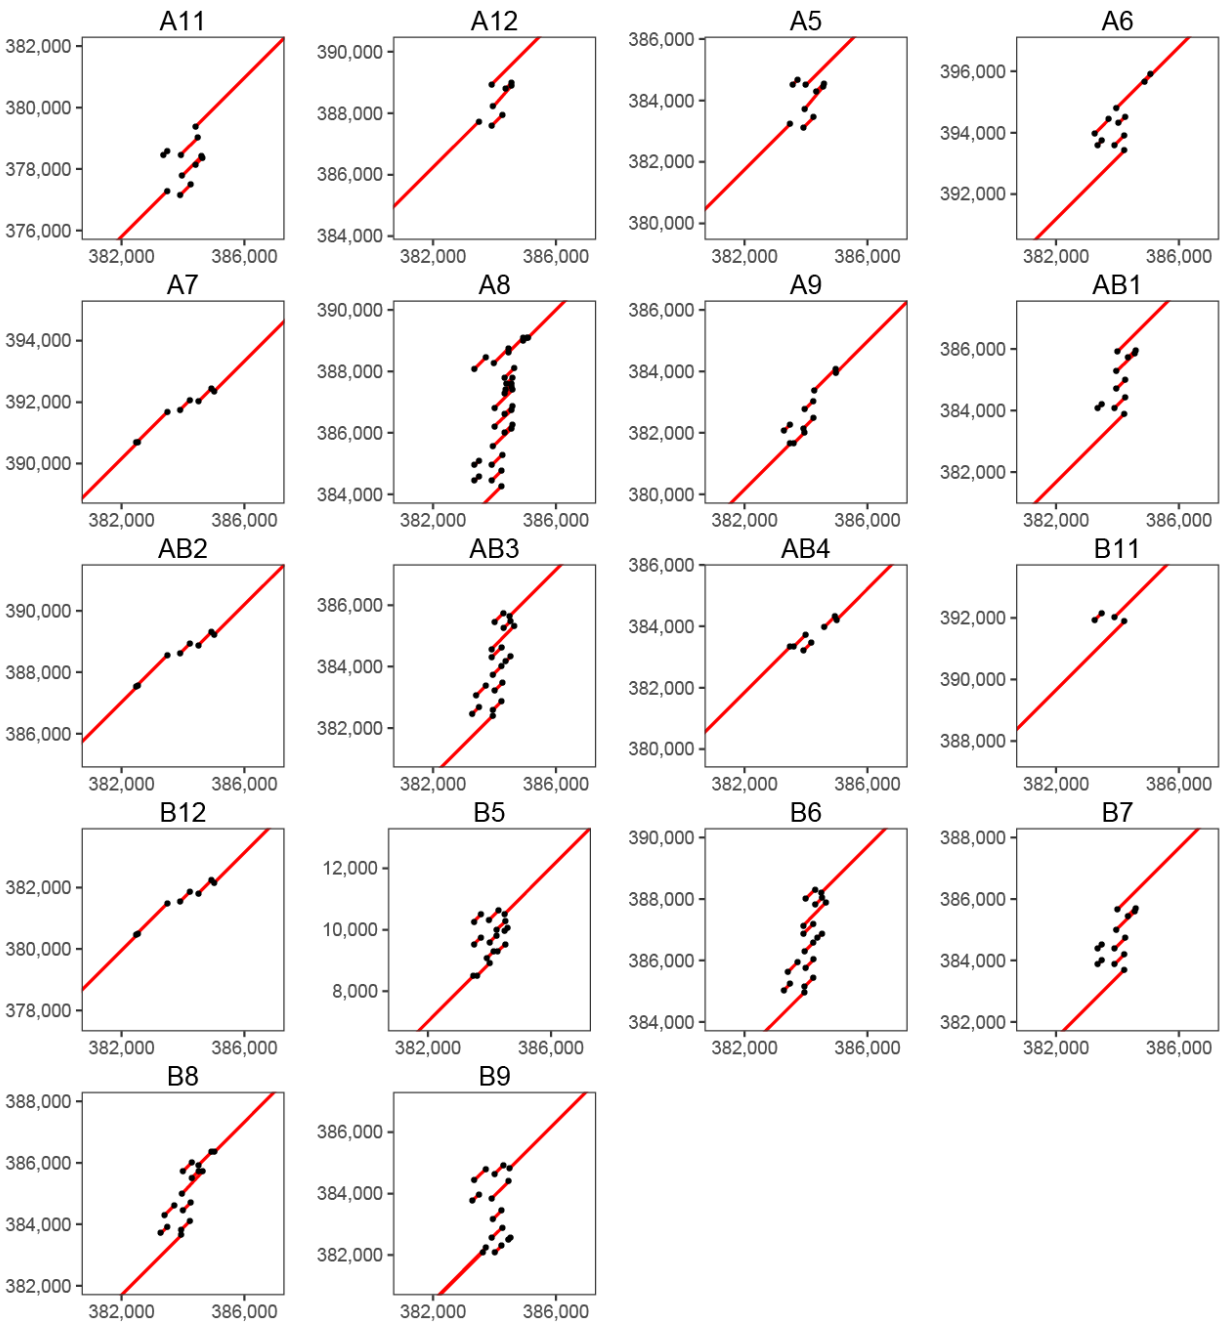

1134  
1135  
1136  
1137  
1138  
1139  
1140  
1141  
1142

**Figure S1.** Dot plots showing the numerous structural variants present at this particular site on chromosome IV. Each dot plot was constructed by plotting the sequence alignments of regions from each founder strain (y-axis) against the S288C reference strain (x-axis).

1143  
1144  
1145  
1146  
1147  
1148  
1149

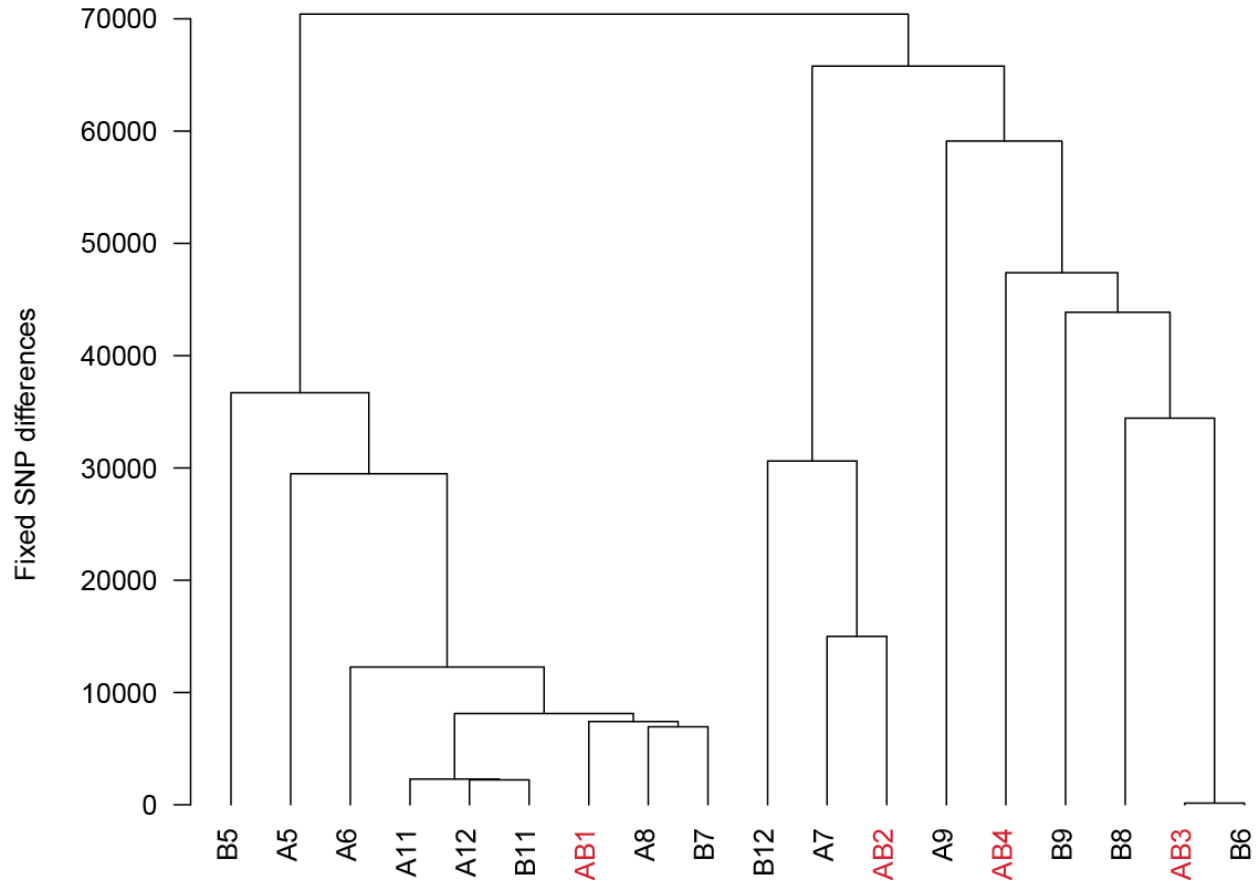

1150  
1151  
1152  
1153  
1154  
1155  
1156  
1157  
1158  
1159  
1160  
1161  
1162  
1163

**Figure S2.** Dendrogram showing the degree of relatedness between the 18 founder strains used in this study. This was constructed in *R* using the *hclust* function on a distance matrix representing the number of differences between each pair of founders. Strains colored in red are the founders from the four-way cross described in Cubillos *et al.* and used in (Cubillos *et al.* 2013, 2017).

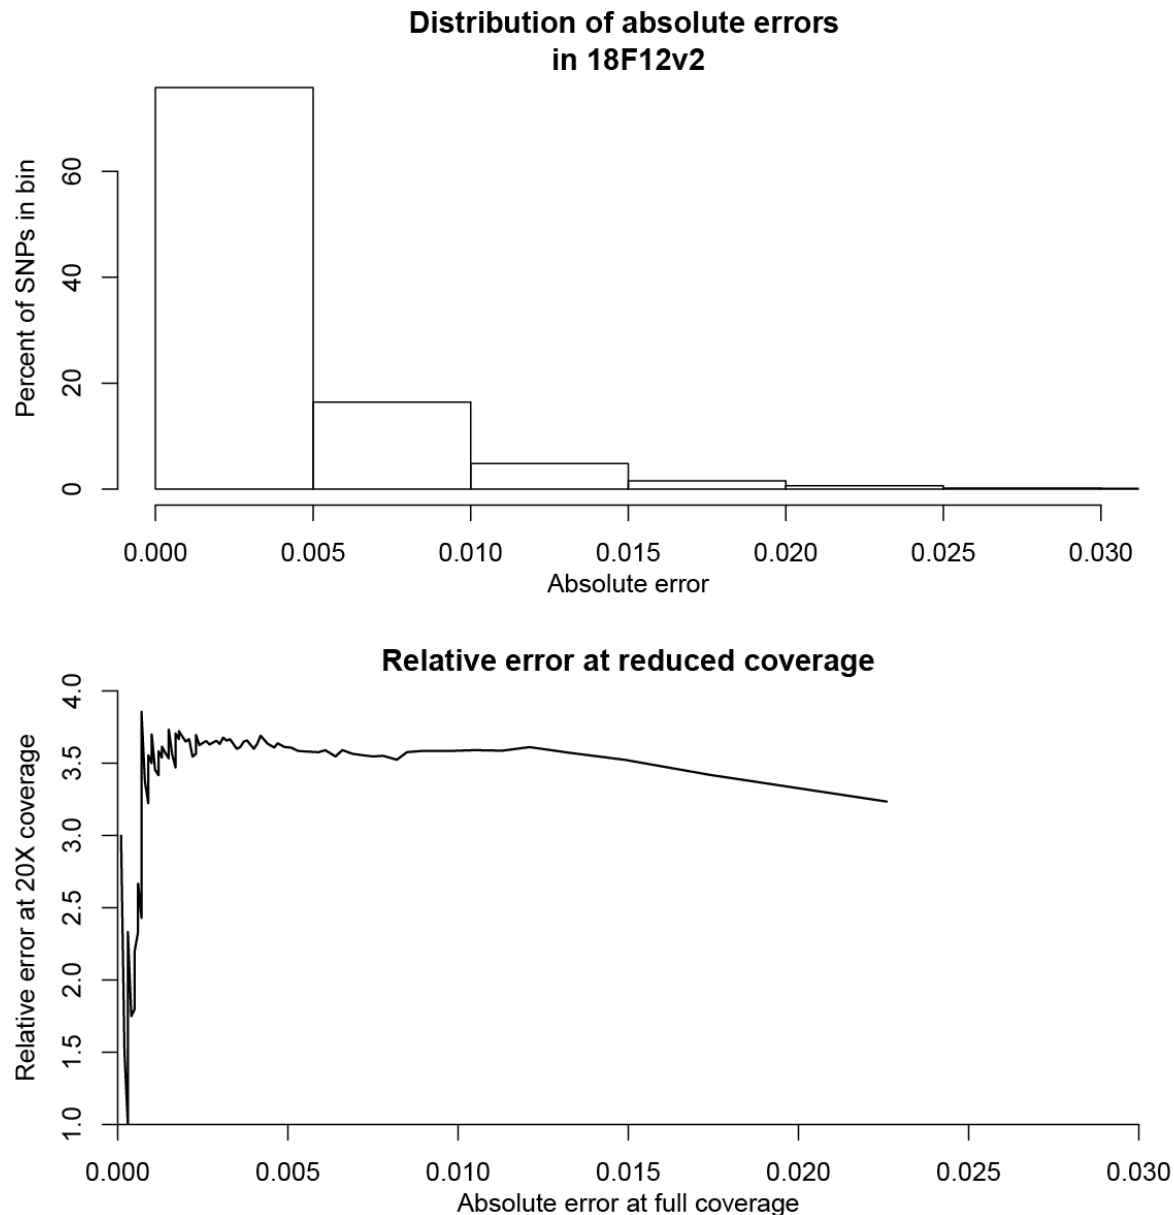

1164  
1165 **Figure S3.** As a measure of the accuracy of the haplotype calling algorithm, we  
1166 calculated the absolute error between haplotype calls at sites harboring private SNPs  
1167 and the SNP frequencies in 18F12v2 estimated from 2230X coverage (A). The vast  
1168 majority of sites tested in this manner showed an error rate of less than one percent.  
1169 We also computed the relative error following downsampling the 18F12v2 data to  
1170 approximately 20x coverage as a function of the absolute error at full coverage (B). At  
1171 20X coverage haplotype frequencies are estimated much more accurately than SNP  
1172 frequencies could be directly estimated at 20X coverage based on binomial sampling.  
1173  
1174  
1175  
1176

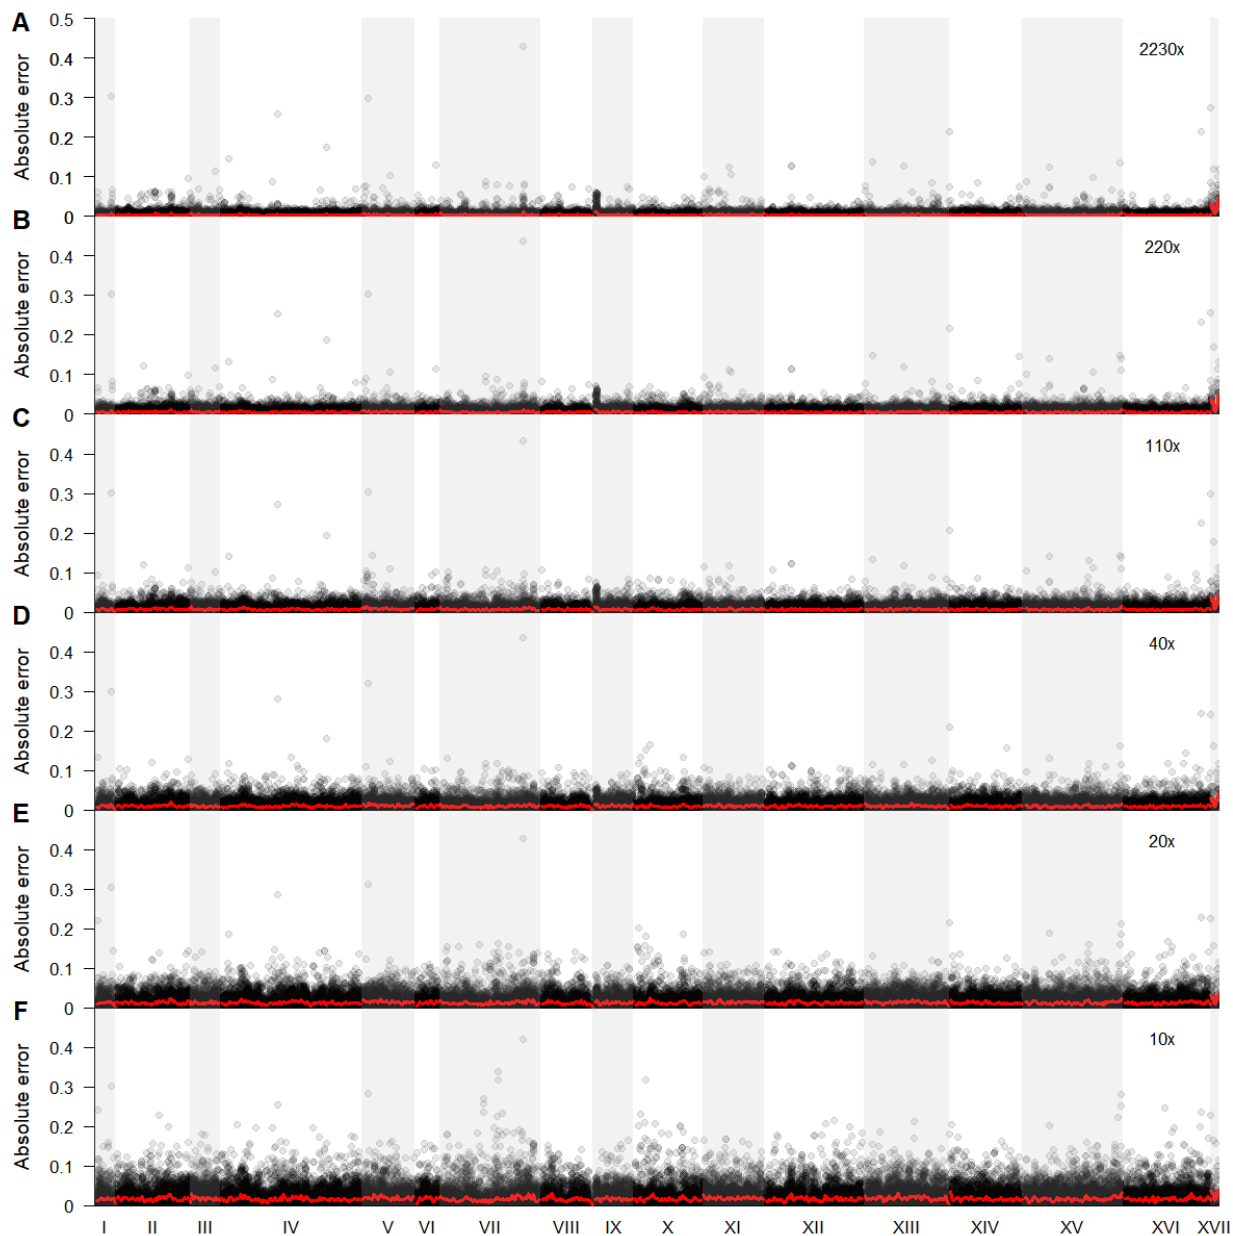

1177  
1178 **Figure S4.** Shown is the absolute error rate between haplotype and SNP frequencies at  
1179 sites with private SNPs for 18F12v2. Panels A-F represent 100%, 10%, 5%, 2%, 1%,  
1180 and 0.5% of the full dataset, which approximately corresponds to the coverages shown  
1181 in the upper right of each panel. The red line represents a kernel regression run using  
1182 the `ksmooth()` function in R with kernel set at 'normal' and bandwidth set at 20000,  
1183 approximating the local expected error rate. Despite clear outliers (that occur  
1184 irrespective of coverage), haplotype frequency estimates are accurate on average.  
1185  
1186



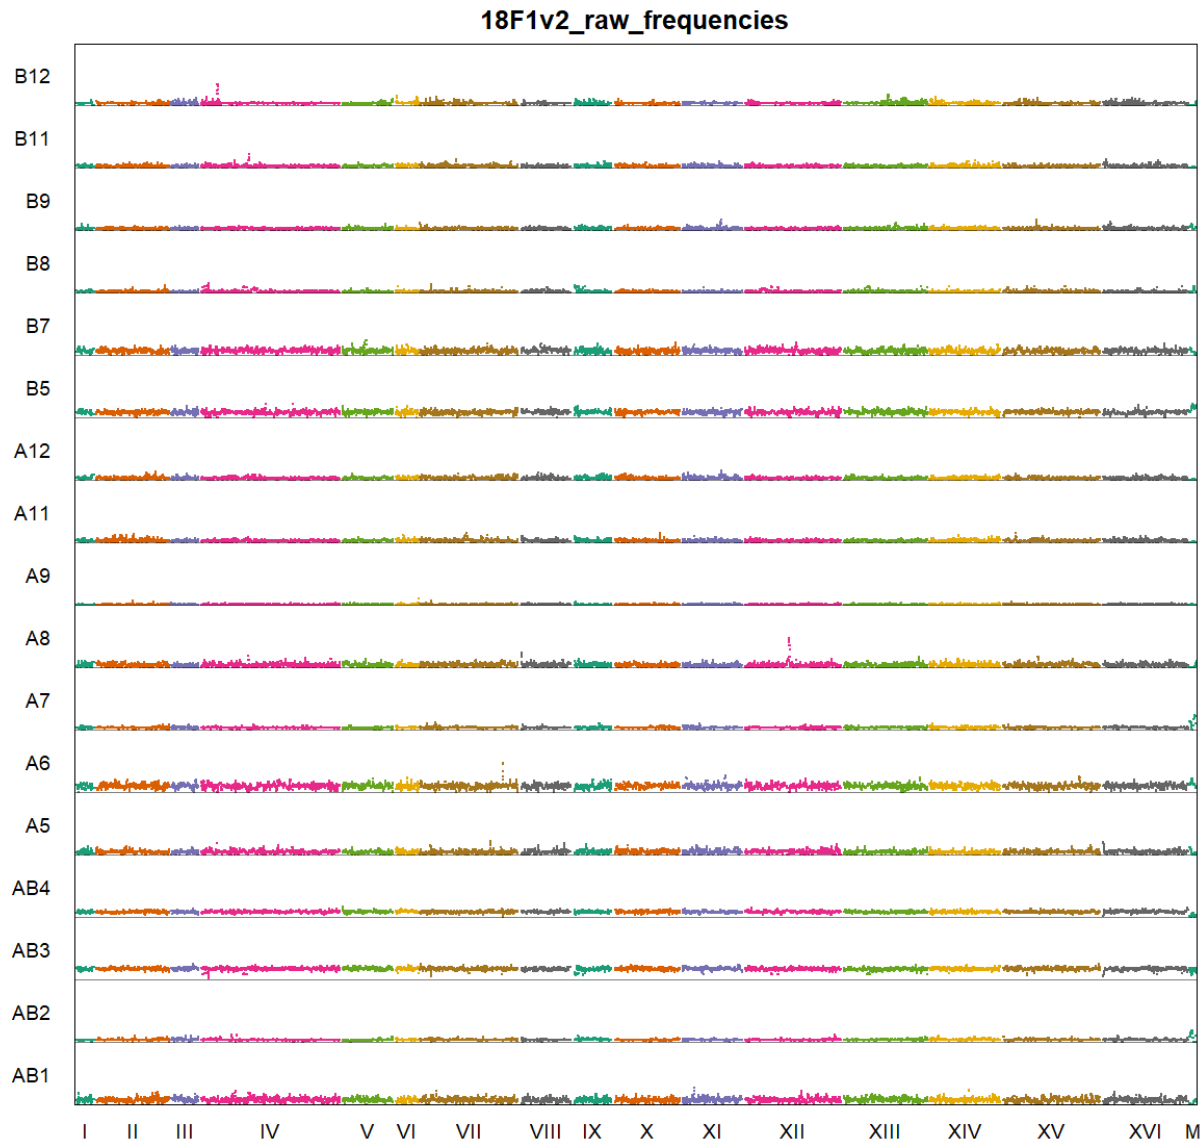

1187  
1188  
1189  
1190  
1191  
1192

**Figure S5.** Haplotype frequencies genome-wide for 18F1v2. This sample was taken after the first meiotic generation of version two of the outcrossed population and shows a more balanced distribution of founder haplotypes than the final generation. Haplotype calls for founder B6 were merged with founder AB3, while founders A12 and B11 were merged with founder A11 due their high sequence similarity.

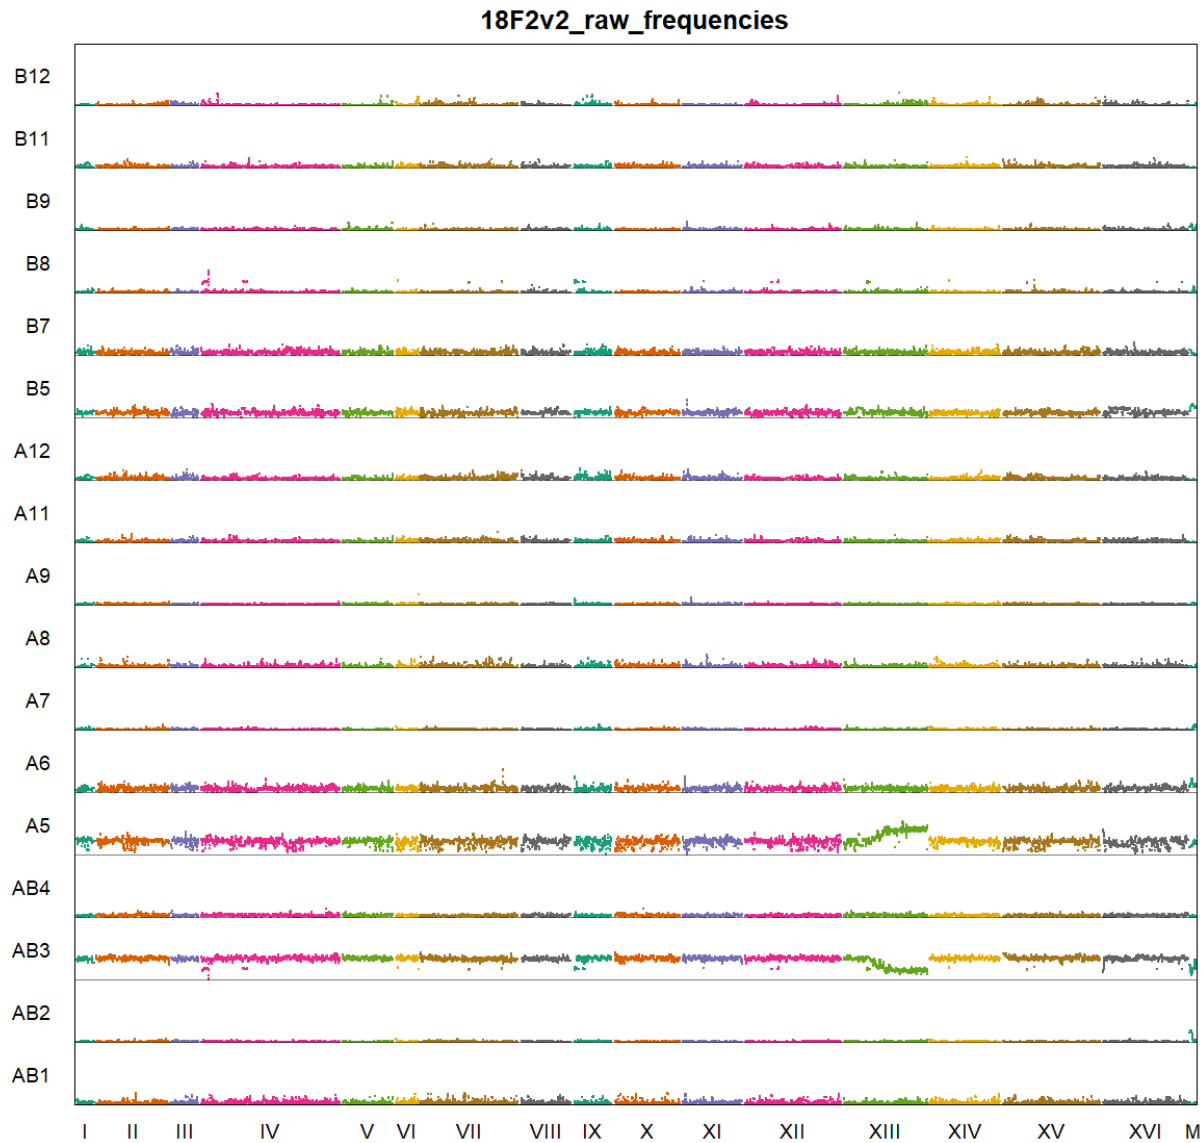

1193  
1194  
1195  
1196  
1197  
1198  
1199  
1200  
1201  
1202  
1203

**Figure S6.** Haplotype frequencies genome-wide for 18F2v2. This sample was taken after the second meiotic generation of version two of the outcrossed population and shows founders AB3 and A5 increasing significantly in frequency as compared to the remaining founders. As above, haplotype calls for founder B6 were merged with founder AB3, while founders A12 and B11 were merged with founder A11.

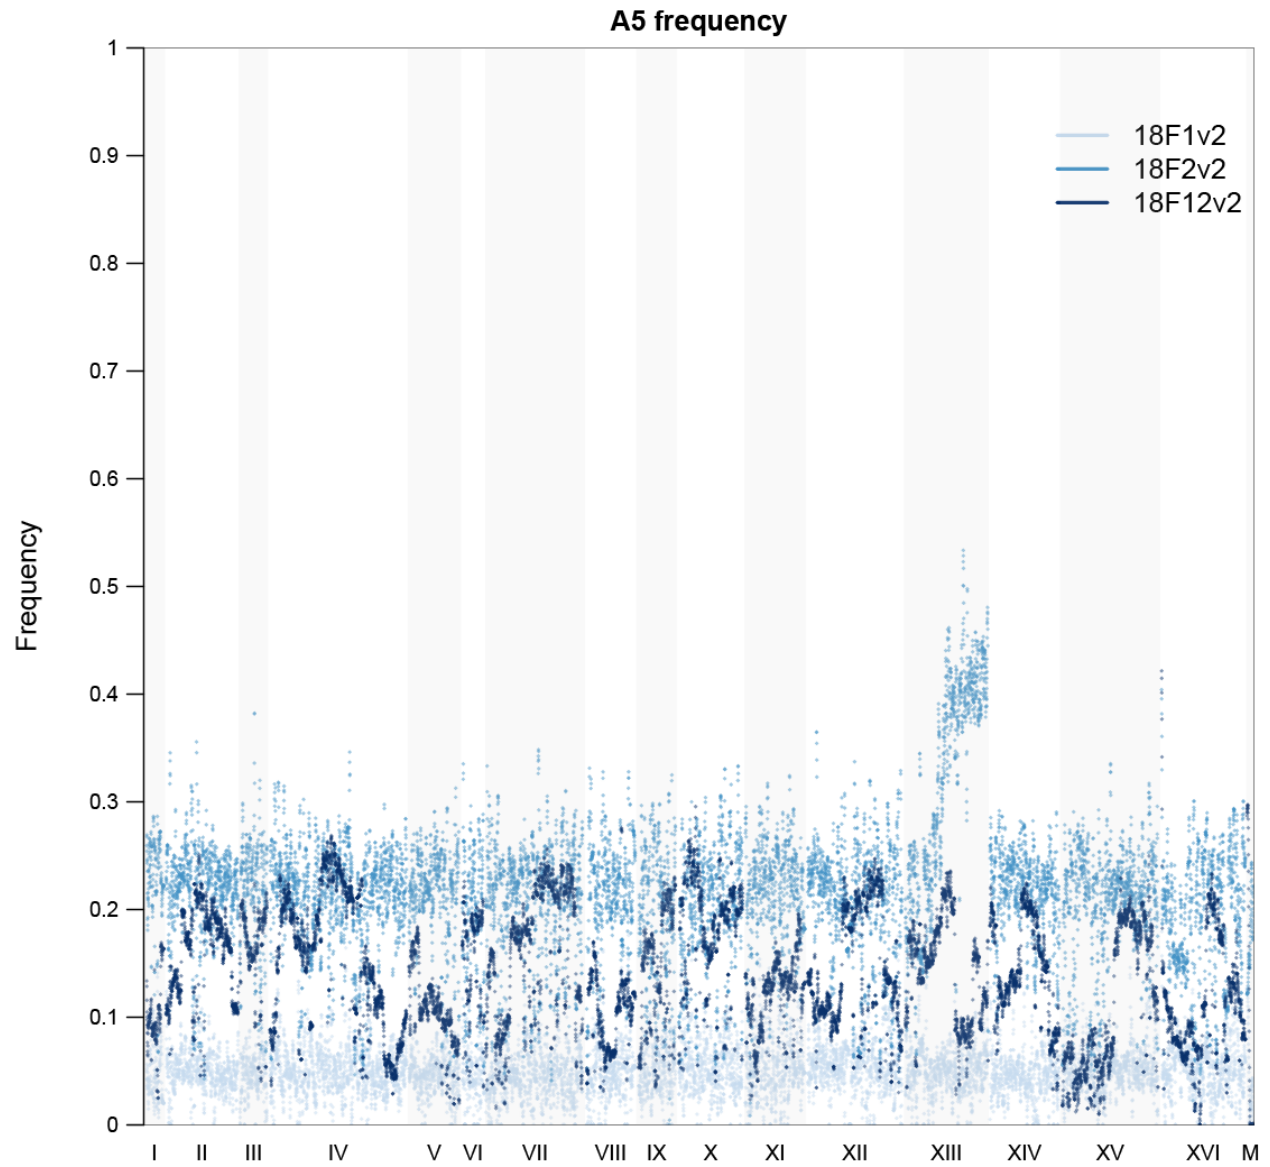

1204  
1205  
1206  
1207  
1208  
1209

**Figure S7.** Haplotype frequency genome-wide for the A5 founding strain across the first (18F1v2), second (18F2v2), and twelfth (18F12v2) meiotic generations of the version 2 outcrossed population.

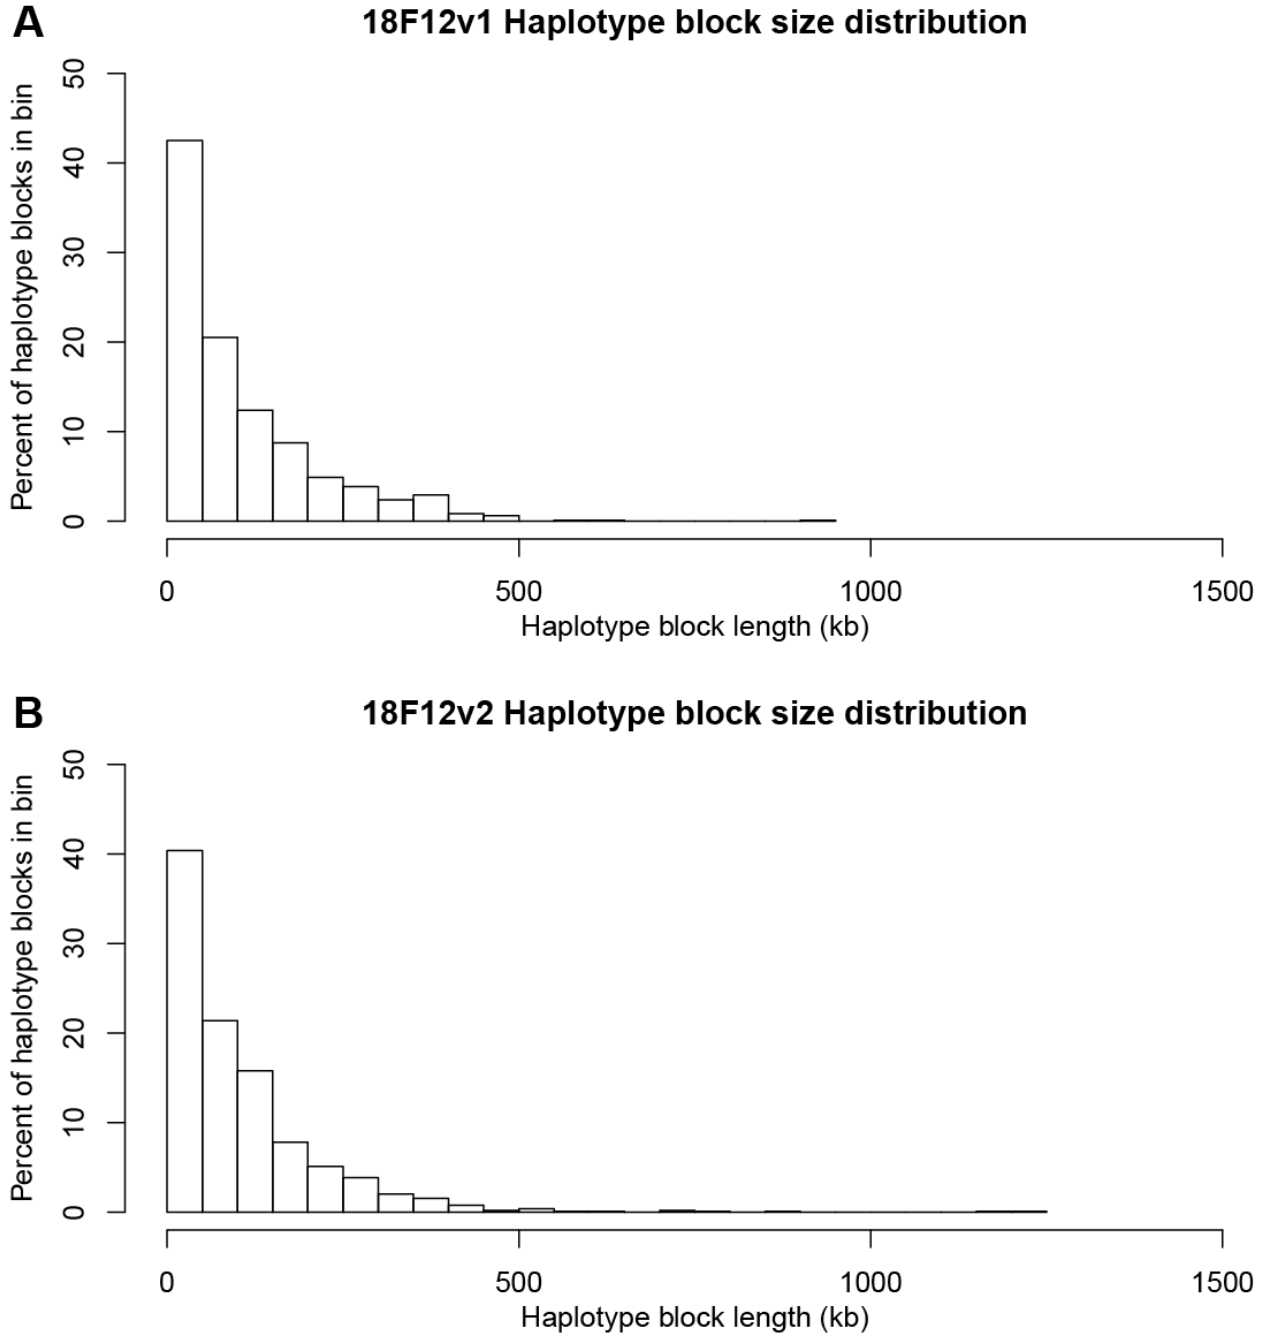

1210  
1211  
1212  
1213

**Figure S8.** Distribution of haplotype block lengths in recombinant haploid clones derived from 18F12v1 (**A**) and 18F12v2 (**B**). All inferred haplotype blocks, including those called as ties between multiple founding strains, were included in this analysis.

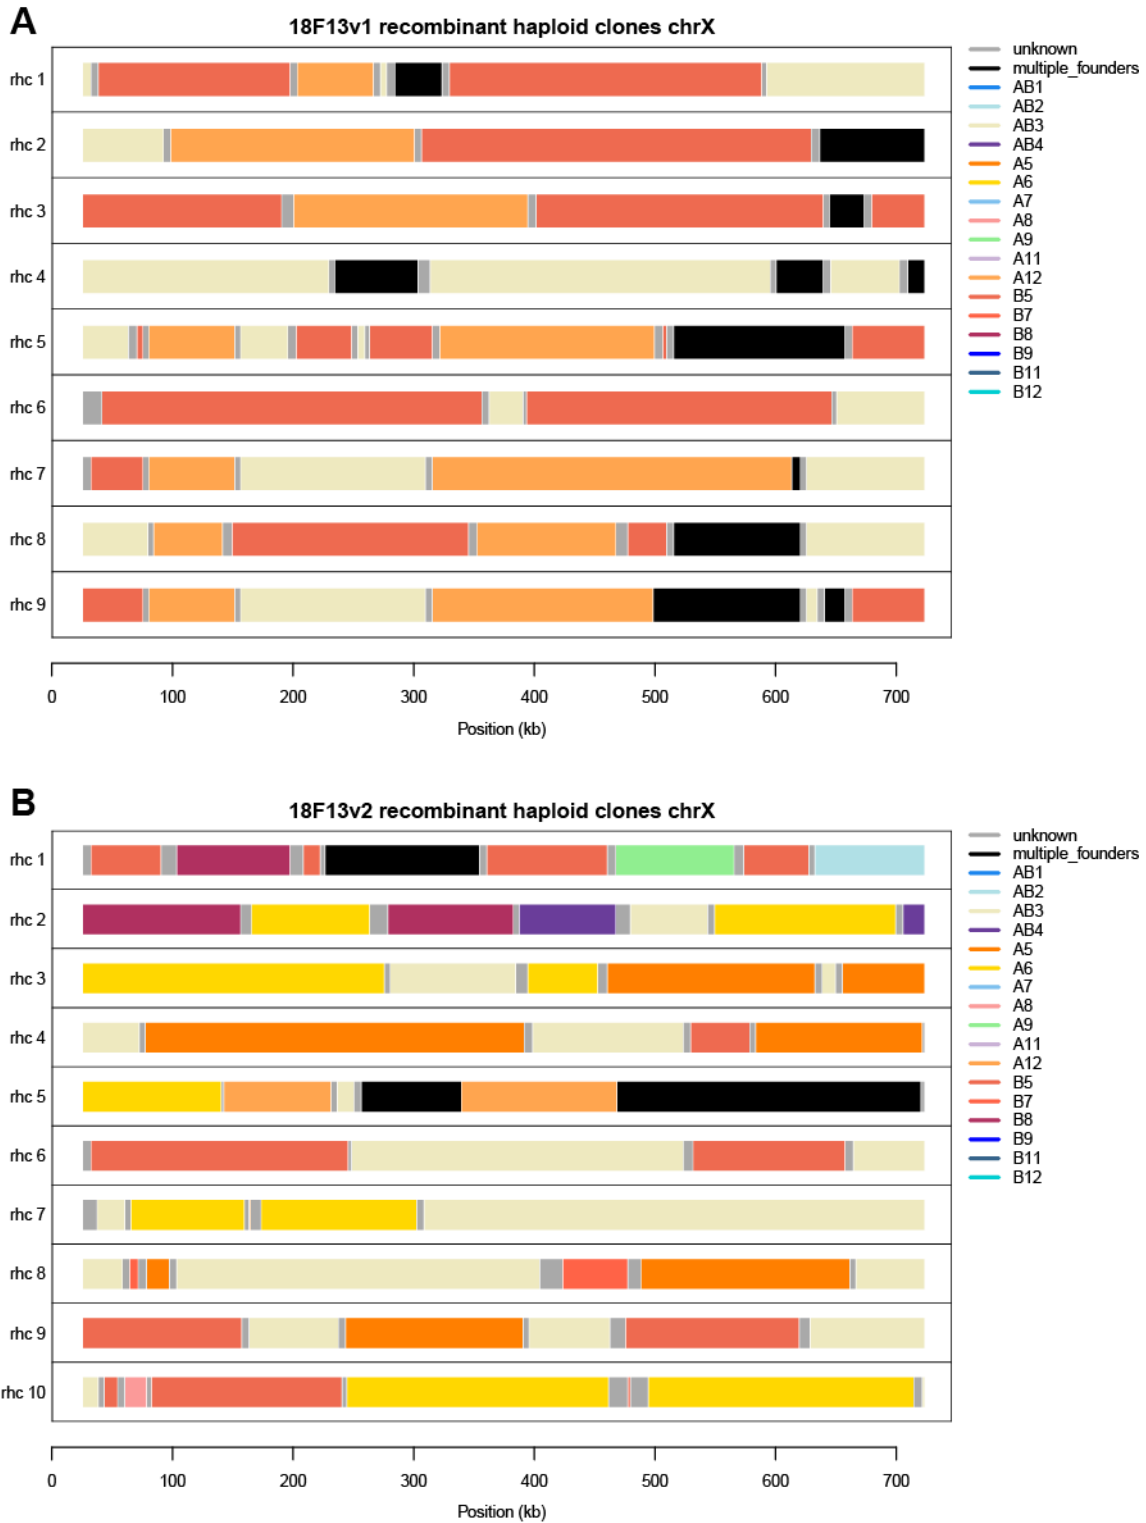

1214  
1215  
1216  
1217  
1218  
1219

**Figure S9.** Haplotype diversity at chromosome XII present in 18F13v1 recombinant haploid clones (A) and 18F13v2 recombinant haploid clones (B).

1220 **Table S1.** List of primers used in this study.

| Primer               | Sequence (5'-3')                                                                                                               | Template                                           | Purpose                                                        |
|----------------------|--------------------------------------------------------------------------------------------------------------------------------|----------------------------------------------------|----------------------------------------------------------------|
| pBS_fwd              | gcggccgcCCCGGTACCCAGCTTTTG                                                                                                     | pBluescript II KS                                  | Assemble <i>hoΔ</i> construct                                  |
| pBS_rev              | CGGGGGATCCACTAGTTC                                                                                                             | pBluescript II KS                                  | Assemble <i>hoΔ</i> construct                                  |
| HO-US_fwd            | tagaactagtgatcccccgTATTCTGATGGCTAACGGTG                                                                                        | Founder B1 gDNA                                    | Assemble <i>hoΔ</i> construct                                  |
| HO-US_rev            | gcttcagctgCCTTTAGAGCGCTCCATTTTC                                                                                                | Founder B1 gDNA                                    | Assemble <i>hoΔ</i> construct                                  |
| pAG61_fwd            | gctctaaggCAGCTGAAGCTTCGTACG                                                                                                    | pAG61                                              | Assemble <i>hoΔ</i> construct                                  |
| pAG61_rev            | aaattttatgATAGGCCACTAGTGGATC                                                                                                   | pAG61                                              | Assemble <i>hoΔ</i> construct                                  |
| HO-DS_fwd            | agtggcctatCATAAAAATTTCTTGCTTGGC                                                                                                | Founder B1 gDNA                                    | Assemble <i>hoΔ</i> construct                                  |
| HO-DS_rev            | aacaaaagctgggtaccggggcgccgcTGC GTTGTACCA CAACTC                                                                                | Founder B1 gDNA                                    | Assemble <i>hoΔ</i> construct                                  |
| HO-big-flank-F       | AAGCGTTCTAAACGCACTATTCA                                                                                                        | all <i>hoΔ</i> founder transformants               | <i>hoΔ</i> check                                               |
| HO-big-flank-R       | ATGGCGTATTTCTACTCCAGCAT                                                                                                        | all <i>hoΔ</i> founder transformants               | <i>hoΔ</i> check                                               |
| YCR043C-US_MX4_F     | TAGAACTAAATGCAAAGAATATTTGTGCCAAGAT AAGGCCAAGAAATTTTGGGGCAACAGTAGGCAG TAAAAGCGCTCTTAACGTA CTTTGGCAAAGGccag ctgaagctctgtacgc     | pAG25 ( <i>natMX4</i> ) or pAG32 ( <i>hphMX4</i> ) | <i>ycr043c::natMX4</i> or <i>ycr043c::hphMX4</i> deletion      |
| YCR043C-DS_MX4_R     | CTCTATGTAGACATATACATATTATTTTCATTGCTTT TTGTAATAAACGAGGAAAATGGTGGGATAAAAAA ATGCATTGTTATTCCTTCGAAACCAGCAGTgcatag gccactagtggatctg | pAG25 ( <i>natMX4</i> ) or pAG32 ( <i>hphMX4</i> ) | <i>ycr043c::natMX4</i> or <i>ycr043c::hphMX4</i> deletion      |
| YCR043C-cds-F        | agctccactgatgcttcctta                                                                                                          | all <i>YCR043C</i> deletion transformants          | <i>YCR043C</i> deletion check                                  |
| YCR043C-cds-R        | cacctctccatcttaagtcg                                                                                                           | all <i>YCR043C</i> deletion transformants          | <i>YCR043C</i> deletion check                                  |
| YCR043C-flank-F      | GGCGGAATGTTGGCTTGGAC                                                                                                           | all <i>YCR043C</i> deletion transformants          | <i>YCR043C</i> deletion check/ create larger deletion cassette |
| YCR043C-flank-R      | GCGCTACCGTAATGCAGTG                                                                                                            | all <i>YCR043C</i> deletion transformants          | <i>YCR043C</i> deletion check/ create larger deletion cassette |
| YCR043C-seq-check-RC | CACTTACCCCTCTGTCAATAGTT                                                                                                        | all <i>YCR043C</i> deletion transformants          | <i>YCR043C</i> deletion check via Sanger Sequencing            |
| barcode-check-F      | gattcggaatctccgagcagaag                                                                                                        | all founder strains                                | barcode check                                                  |
| barcode-check-R      | ttcagaacaactctggcgca                                                                                                           | all founder strains                                | barcode check                                                  |

1221 \*Uppercase letters that follow lowercase letters represent the priming sequence, while  
1222 the lowercase letters represent regions of overlap homology.  
1223 \*\*Lowercase letters that follow uppercase letters represent the priming sequence, while  
1224 the uppercase letters represent regions of flanking homology.  
1225  
1226  
1227  
1228  
1229  
1230  
1231  
1232  
1233  
1234  
1235  
1236  
1237  
1238  
1239  
1240  
1241  
1242  
1243  
1244  
1245  
1246  
1247  
1248  
1249  
1250  
1251  
1252  
1253  
1254  
1255  
1256  
1257  
1258  
1259  
1260  
1261  
1262  
1263  
1264  
1265  
1266

1267 **Table S2.** Sporulation efficiency of all crosses\*

|            | <b>B1</b> | <b>B2</b> | <b>B3</b> | <b>B4</b> | <b>B5</b> | <b>B6</b> | <b>B7</b> | <b>B8</b> | <b>B9</b> | <b>B11</b> | <b>B12</b> |
|------------|-----------|-----------|-----------|-----------|-----------|-----------|-----------|-----------|-----------|------------|------------|
| <b>A1</b>  | 0         | 4         | 1         | 3         | 3         | 4         | 3         | 4         | 4         | 1          | 4          |
| <b>A2</b>  | 2         | 1         | 4         | 1         | 4         | 4         | 4         | 3         | 2         | 1          | 3          |
| <b>A3</b>  | 5         | 3         | 3         | ND**      | 4         | 3         | 4         | 0         | 2         | 4          | 4          |
| <b>A4</b>  | 4         | 4         | 3         | 4         | 3         | 2         | 4         | 4         | 3         | 3          | 4          |
| <b>A5</b>  | 3         | 2         | 3         | 1         | 1         | 2         | 4         | 2         | 0         | 0          | 1          |
| <b>A6</b>  | 3         | 4         | 4         | 3         | 3         | 4         | 4         | 4         | 3         | 2          | 4          |
| <b>A7</b>  | 3         | 4         | 5         | 4         | 4         | 5         | 5         | 5         | 4         | 4          | 5          |
| <b>A8</b>  | 3         | 3         | 3         | 4         | 3         | 2         | 4         | 0         | 4         | 0          | 4          |
| <b>A9</b>  | 5         | 4         | 3         | 3         | 4         | 2         | 4         | 1         | 2         | 4          | 4          |
| <b>A11</b> | 4         | 4         | 4         | 4         | 4         | 5         | 4         | 3         | 4         | 1          | 4          |
| <b>A12</b> | 4         | 4         | 4         | 3         | 3         | 3         | 4         | 4         | 4         | 0          | 4          |

1268 \*A score of 0 means no asci were visible in the field of view while a score of 5 means  
1269 approximately 90% or more of the objects in the field of view were asci.

1270 \*\*No data

1271

1272

1273

1274

1275

1276

1277

1278

1279

1280

1281

1282

1283

1284

1285

1286

1287

1288

1289

1290

1291

1292

1293

1294

1295

1296

1297

1298

1299



1300 **Table S3.** Specific sporulation conditions used in this study.

| Population | Outcrossing Cycle | Sporulation time (in days) | Sporulation volume (in mL) | Sporulation vessel | Additional notes                  |
|------------|-------------------|----------------------------|----------------------------|--------------------|-----------------------------------|
| 18F1v1     | 1                 | 5                          | 200                        | 1L erlenmeyer      |                                   |
| 18F2v1     | 2                 | 5                          | 200                        | 1L erlenmeyer      |                                   |
| 18F3v1     | 3                 | 5                          | 200                        | 1L erlenmeyer      |                                   |
| 18F4v1     | 4                 | 5                          | 200                        | 1L erlenmeyer      |                                   |
| 18F5v1     | 5                 | 5                          | 200                        | 1L erlenmeyer      |                                   |
| 18F6v1     | 6                 | 5                          | 200                        | 1L erlenmeyer      |                                   |
| 18F7v1     | 7                 | 5                          | 200                        | 1L erlenmeyer      |                                   |
| 18F8v1     | 8                 | 5                          | 200                        | 1L erlenmeyer      |                                   |
| 18F9v1     | 9                 | 5                          | 200                        | 1L erlenmeyer      |                                   |
| 18F10v1    | 10                | 5                          | 200                        | 1L erlenmeyer      |                                   |
| 18F11v1    | 11                | 5                          | 200                        | 1L erlenmeyer      |                                   |
| 18F12v1    | 12                | 5                          | 200                        | 1L erlenmeyer      |                                   |
| 18F1v2     | 1                 | 6                          | 4                          | 24DWP              | All crosses sporulated separately |
| 18F2v2     | 2                 | 4                          | 200                        | 1L erlenmeyer      |                                   |
| 18F3v2     | 3                 | 3                          | 200                        | 1L erlenmeyer      |                                   |
| 18F4v2     | 4                 | 3                          | 50                         | 250mL erlenmeyer   |                                   |
| 18F5v2     | 5                 | 4                          | 50                         | 250mL erlenmeyer   |                                   |
| 18F6v2     | 6                 | 4                          | 50                         | 250mL erlenmeyer   |                                   |
| 18F7v2     | 7                 | 3                          | 50                         | 250mL erlenmeyer   |                                   |
| 18F8v2     | 8                 | 4                          | 50                         | 250mL erlenmeyer   |                                   |
| 18F9v2     | 9                 | 4                          | 50                         | 250mL erlenmeyer   |                                   |
| 18F10v2    | 10                | 3                          | 50                         | 250mL erlenmeyer   |                                   |
| 18F11v2    | 11                | 4                          | 50                         | 250mL erlenmeyer   |                                   |
| 18F12v2    | 12                | 5                          | 50                         | 250mL erlenmeyer   |                                   |

1301

1302

1303 **Table S4. All pairwise SNP differences between founder strains**

|     | AB1   | AB2   | AB3         | AB4   | A5    | A6    | A7    | A8    | A9    |
|-----|-------|-------|-------------|-------|-------|-------|-------|-------|-------|
| AB1 | 0     | 68178 | 60061       | 66679 | 27765 | 12131 | 63233 | 7410  | 70076 |
| AB2 | 68178 | 0     | 48848       | 55578 | 64142 | 67101 | 15008 | 68575 | 63395 |
| AB3 | 60061 | 48848 | 0           | 40134 | 53034 | 58437 | 48360 | 60383 | 52287 |
| AB4 | 66679 | 55578 | 40134       | 0     | 54606 | 64986 | 50777 | 67027 | 59111 |
| A5  | 27765 | 64142 | 53034       | 54606 | 0     | 29485 | 59901 | 27980 | 66127 |
| A6  | 12131 | 67101 | 58437       | 64986 | 29485 | 0     | 62410 | 12281 | 69433 |
| A7  | 63233 | 15008 | 48360       | 50777 | 59901 | 62410 | 0     | 12281 | 63205 |
| A8  | 7410  | 68575 | 60383       | 67027 | 27980 | 12281 | 63629 | 0     | 70409 |
| A9  | 70076 | 63395 | 52287       | 59111 | 66127 | 69433 | 63205 | 70409 | 0     |
| A11 | 8140  | 68612 | 60416       | 67088 | 28220 | 12261 | 63669 | 7898  | 70395 |
| A12 | 7988  | 68533 | 60365       | 67049 | 27943 | 12154 | 63594 | 7794  | 70361 |
| B5  | 28183 | 63545 | 53668       | 55176 | 36714 | 30476 | 59484 | 28362 | 66654 |
| B6  | 60023 | 48876 | <b>157*</b> | 40176 | 53023 | 58407 | 48373 | 60347 | 52315 |
| B7  | 7320  | 68536 | 60350       | 66977 | 27893 | 12207 | 63582 | 6964  | 70372 |
| B8  | 58073 | 52026 | 34405       | 44614 | 54177 | 56026 | 51878 | 58356 | 53822 |
| B9  | 54032 | 56216 | 43784       | 47394 | 49980 | 53422 | 54434 | 54244 | 57068 |
| B11 | 8083  | 68613 | 60397       | 67067 | 28111 | 12214 | 63672 | 7807  | 70382 |
| B12 | 45831 | 25006 | 52332       | 59231 | 49973 | 46772 | 30619 | 46234 | 65780 |

1304

|     | A11          | A12          | B5    | B6          | B7    | B8    | B9    | B11          | B12   |
|-----|--------------|--------------|-------|-------------|-------|-------|-------|--------------|-------|
| AB1 | 8140         | 7988         | 28183 | 60023       | 7320  | 58073 | 54032 | 8083         | 45831 |
| AB2 | 68612        | 68533        | 63545 | 48876       | 68536 | 52026 | 56216 | 68613        | 25006 |
| AB3 | 60416        | 60365        | 53668 | <b>157*</b> | 60350 | 34405 | 43784 | 60397        | 52332 |
| AB4 | 67088        | 67049        | 55176 | 40176       | 66977 | 44614 | 47394 | 67067        | 59231 |
| A5  | 28220        | 27943        | 36714 | 53023       | 27893 | 54177 | 49980 | 28111        | 49973 |
| A6  | 12261        | 12154        | 30476 | 58407       | 12207 | 56026 | 53422 | 12214        | 46772 |
| A7  | 63669        | 63594        | 59484 | 48373       | 63582 | 51878 | 54434 | 63672        | 30619 |
| A8  | 7898         | 7794         | 28362 | 60347       | 6964  | 58356 | 54244 | 7807         | 46234 |
| A9  | 70395        | 70361        | 66654 | 52315       | 70372 | 53822 | 57068 | 70382        | 65780 |
| A11 | 0            | <b>2283*</b> | 28464 | 60394       | 7989  | 58473 | 54447 | <b>2294*</b> | 46503 |
| A12 | <b>2283*</b> | 0            | 28328 | 60343       | 7885  | 58408 | 54405 | <b>2217*</b> | 46396 |
| B5  | 28464        | 28328        | 0     | 53655       | 28475 | 54111 | 52160 | 28451        | 49324 |
| B6  | 60394        | 60343        | 53655 | 0           | 60315 | 34439 | 43783 | 60375        | 52328 |
| B7  | 7989         | 7885         | 28475 | 60315       | 0     | 58340 | 54268 | 8006         | 46164 |
| B8  | 58473        | 58408        | 54111 | 34439       | 58340 | 0     | 43869 | 58454        | 54419 |
| B9  | 54447        | 54405        | 52160 | 43783       | 54268 | 43869 | 0     | 54438        | 53416 |
| B11 | <b>2294*</b> | <b>2217*</b> | 28451 | 60375       | 8006  | 58454 | 54438 | 0            | 46520 |
| B12 | 46503        | 46396        | 49324 | 52328       | 46164 | 54419 | 53416 | 46520        | 0     |

1305 \*Cells bolded and filled in with blue represent founders that were collapsed due to high  
 1306 sequence similarity (AB3/B6; A11/A12/B11). The table was split for readability.

1307

1308 **Table S5.** Mean haplotype frequencies genome-wide through one, two, and twelve  
1309 rounds of outcrossing in 18F12v2.

| Founder | 18F1v2_frequency | 18F2v2_frequency | 18F12v2_frequency |
|---------|------------------|------------------|-------------------|
| AB1     | 8.0%             | 3.2%             | 1.2%              |
| AB2     | 4.4%             | 1.3%             | 0.5%              |
| AB3     | 17.6%            | 33.2%            | 41.4%             |
| AB4     | 9.0%             | 3.3%             | 3.3%              |
| A5      | 5.0%             | 21.8%            | 14.0%             |
| A6      | 10.5%            | 6.4%             | 14.3%             |
| A7      | 4.2%             | 1.2%             | 0.4%              |
| A8      | 4.3%             | 2.2%             | 0.7%              |
| A9      | 1.1%             | 1.4%             | 0.5%              |
| A11     | 3.5%             | 2.8%             | 1.2%              |
| A12     | 3.6%             | 3.4%             | 1.7%              |
| B5      | 9.1%             | 8.4%             | 11.3%             |
| B7      | 7.2%             | 4.6%             | 1.0%              |
| B8      | 2.3%             | 1.4%             | 5.7%              |
| B9      | 3.2%             | 1.3%             | 0.8%              |
| B11     | 3.1%             | 2.6%             | 1.3%              |
| B12     | 3.8%             | 1.4%             | 0.6%              |

1310

1311

1312 **Note S1.** Strains A9, B1, and B9 all grew slowly after O/N incubation, so all 5mL from  
1313 each culture was transferred to 5mL of YPD and incubated an additional 3h at 30°C at  
1314 250 RPM. During this time, the rest of the haploid strains remained at RT. For mating,  
1315 200uL of culture from these slow-growing strains was mixed with 100uL of culture from  
1316 the rest of the haploid strains..

1317 **Note S2.** Before taking OD630 measurements, the following crosses were accidentally  
1318 combined: A5xB6 with A5xB7, A6xB2 with A6xB3, A6xB8 with A6xB4, and A11xB7  
1319 with A11xB6. To correct for this, twice of much of the combined cultures were added to  
1320 the final spore pool after normalizing cell density.

1321 **Note S3.** Founder strains A5, A7-A9, A11, A12 and B5-B12 (excluding B10) were  
1322 sequenced using PE100 reads, while founders A1-A4 and A6 were sequenced using  
1323 PE150 reads.

1324 **Note S4.** In one of the recombinant haploid clones derived from 18F12v2 (rhc 10), the  
1325 entirety of chromosome I was called as unknown. Closer examination showed that this  
1326 chromosome is duplicated and heterozygous for two founding strains, suggesting a  
1327 partial diploidization event.

1328
